# Longitudinal associations of epigenetic aging with cognitive aging in Hispanic/Latino adults from the Hispanic Community Health Study/Study of Latinos

Myriam Fornage<sup>1,2</sup>, Wassim Tarraf<sup>3</sup>, Rui Xia<sup>1</sup>, Adriana Ordonez<sup>1</sup>, Tamar Sofer<sup>4,5,6</sup>, Freddie Márquez<sup>7</sup>, Bharat Thyagarajan<sup>8</sup>, Gregory A. Talavera<sup>9</sup>, Linda C. Gallo<sup>9</sup>, Charles DeCarli<sup>10</sup>, Hector M. González<sup>7</sup>

<sup>1</sup>Institute of Molecular Medicine, McGovern Medical School, The University of Texas Health Science Center at Houston, Houston, TX 77030, USA

<sup>2</sup>Human Genetics Center, School of Public Health, The University of Texas Health Science Center at Houston, Houston, TX 77030, USA

<sup>3</sup>Institute of Gerontology and Department of Healthcare Sciences, Wayne State University, Detroit, MI 48202, USA

<sup>4</sup>Department of Medicine, Brigham and Women's Hospital, Harvard Medical School, Boston, MA 02115, USA

<sup>5</sup>CardioVascular Institute, Beth Israel Deaconess Medical Center, Boston, MA 02215, USA

<sup>6</sup>Department of Biostatistics, Harvard T.H. Chan School of Public Health, Boston, MA 02115, USA

<sup>7</sup>Department of Neurosciences, University of California San Diego, La Jolla, CA 92093, USA

<sup>8</sup>Department of Laboratory Medicine and Pathology, University of Minnesota, Minneapolis, MN 55455, USA

<sup>9</sup>Department of Psychology, San Diego State University, San Diego, CA 92182, USA

<sup>10</sup>Department of Neurology, University of California, Sacramento, CA 95817, USA

**Correspondence to:** Myriam Fornage; email: [Myriam.Fornage@uth.tmc.edu](mailto:Myriam.Fornage@uth.tmc.edu)

**Keywords:** epigenetic clocks, DNA methylation, Hispanic/Latinos, cognitive function, dementia

**Received:** April 4, 2025

**Accepted:** July 22, 2025

**Published:**

**Copyright:** © 2025 Fornage et al. This is an open access article distributed under the terms of the [Creative Commons Attribution License](https://creativecommons.org/licenses/by/4.0/) (CC BY 4.0), which permits unrestricted use, distribution, and reproduction in any medium, provided the original author and source are credited.

## ABSTRACT

Due to the paucity of longitudinal DNA methylation data (DNAm), especially among Hispanic/Latino adults, the association between changes in epigenetic clocks over time and cognitive aging phenotypes has not been investigated.

This longitudinal study included 2671 Hispanic/Latino adults (57 years; 66% women) with blood DNAm data and neurocognitive function assessed at two visits ~7 years apart. We evaluated the associations of 5 epigenetic clocks and their between-visit change with multiple measures of cognitive aging that included a global and domain-specific cognitive function score at each visit, between-visit change in global and domain-specific cognitive function score, and MCI diagnosis at visit 2 (V2).

There were significant associations between greater acceleration of all clocks and lower cognitive function at each visit and MCI at V2. The strongest associations were observed for GrimAge and DunedinPACE. There were significant associations of between-visit increase in PhenoAge and GrimAge acceleration with decline in cognitive function and greater risk of MCI diagnosis at V2.

**Epigenetic aging is associated with lower global and domain-specific cognitive function, greater cognitive decline, and greater risk of MCI in Hispanic/Latino adults. Longitudinal assessment of change in age acceleration for second-generation clocks, GrimAge and PhenoAge may provide additional value in predicting cognitive aging beyond a single time point assessment.**

## INTRODUCTION

Aging can be defined as the time-related deterioration of physiological function that leads to physical and functional decline and vulnerability to chronic conditions, such as cognitive decline and dementia [1]. There is considerable interindividual variation in the rate of aging, and individuals with the same chronological age can differ in their level of age-dependent biological changes, known as biological age. The development of biomarkers of biological age, which can be used to assess the effectiveness of aging interventions and accurately predict age-related conditions and mortality, is an expanding area of research [2].

DNA methylation (DNAm) is an epigenetic mechanism by which genes and environmental, lifestyle, and sociocultural exposures dynamically interact to regulate gene expression, thereby shaping various traits related to health and aging. Most human tissues and cell types exhibit profound changes in DNAm patterns with advancing age [3, 4], and multiple DNAm signatures of aging have been characterized across various human tissues [5–11]. These “epigenetic clocks” are thought to capture different aspects of the multidimensional aging process. While first-generation epigenetic clocks were developed to specifically predict chronological age [6, 7, 11], second- and third-generation epigenetic clocks have been recently proposed to predict biological age represented by various clinical biomarkers of physiological dysregulation and change in health indicators [5, 8–10]. Age acceleration, the deviation of the DNAm-estimated age from the chronological age, has been proposed as a novel biomarker of aging. Indeed, positive age acceleration, where a person’s biological age is older than their chronological age, has been associated with a greater risk of various diseases and mortality [12].

Due to the paucity of longitudinal DNAm data, especially among Hispanic/Latino adults, the association between changes in age acceleration over time and cognitive aging phenotypes has not been widely investigated.

We leveraged data from the Study of Latinos-Investigation of Neurocognitive Aging (SOL-INCA) to examine the associations of three generation epigenetic clocks and their change over a 7-year period, with

cognitive decline and mild cognitive impairment (MCI) in Hispanic/Latino middle-aged and older adults.

## RESULTS

Characteristics of the study sample are shown in Table 1. The mean age at visit 1 was 57 years and there were 66% women. On average, educational attainment was 11 years. Approximately, one third of the study sample had an ideal cardiovascular health as measured by American Heart Association (AHA) Life’s Simple 7, while 29% had poor cardiovascular health. The frequency of MCI in the sample was 21% and that of significant cognitive decline was 50%. Estimated DNA methylation age by each of the 5 clocks was strongly correlated with chronological age at each visit ( $r = 0.76$  to  $0.86$ , Supplementary Table 1), with the strongest correlations observed for GrimAge. For each clock, measures of age acceleration were strongly correlated across the two visits ( $r = 0.81$  to  $0.93$ , Supplementary Table 2). At visit 1, the correlations among measures of age acceleration by the various clocks varied between  $0.18$  to  $0.88$ , with the strongest correlation observed between the Horvath and Hannum clocks. Similar correlations were observed at visit 2 (Supplementary Table 2).

### Cross-sectional associations of epigenetic clocks with cognitive aging measures

Cross-sectional associations of the five epigenetic clocks with the global cognitive function score are shown at each visit in Table 2. There were significant associations between greater age acceleration for all clocks and lower global cognitive function at both visits. The strongest associations were observed for GrimAge and DunedinPACE. Adjustments for education, language preference, and cardiovascular health did not meaningfully attenuate these associations. Cross-sectional associations of the five epigenetic clocks with individual cognitive tests showed similar results (Supplementary Table 3), although there was no association of the first-generation clocks with B-SEVLT sum or B-SEVLT recall. Associations of second- and third-generation clocks were strongest with WF and DSST.

Associations of MCI status at visit 2 with epigenetic clocks measured at each visit are shown in Table 3.

**Table 1. Descriptive characteristics of the study participants.**

| <b>Trait</b>                                     | <b>Mean (SD) or percentage (N)</b> |
|--------------------------------------------------|------------------------------------|
| <i>N</i>                                         | 2671                               |
| Visit 1 age (years)                              | 56.6 (7.7)                         |
| Visit 2 age (years)                              | 62.5 (7.6)                         |
| Time between visits (years)                      | 7.0 (1.1)                          |
| Females at visit 1                               | 65.80%                             |
| Years of education at visit 1                    | 10.7 (4.6)                         |
| MCI at visit 2                                   | 21.10%                             |
| Significant cognitive decline at visit 2         | 49.60%                             |
| Hispanic background at visit 1                   |                                    |
| Central American                                 | 9.90%                              |
| Cuban                                            | 15.80%                             |
| Dominican                                        | 10.40%                             |
| Mexican                                          | 36.10%                             |
| Puerto Rican                                     | 19.10%                             |
| South American                                   | 6.90%                              |
| Mixed/Other                                      | 1.80%                              |
| Cardiovascular Health (LS7) at visit 1           |                                    |
| Poor                                             | 28.60%                             |
| Intermediate                                     | 36.50%                             |
| Ideal                                            | 34.90%                             |
| APOE4 alleles carrier                            |                                    |
| 0                                                | 76.70%                             |
| 1                                                | 21.40%                             |
| 2                                                | 1.90%                              |
| Age acceleration at visit 1                      |                                    |
| Hannum                                           | −0.004 (3.366)                     |
| Horvath                                          | −0.001 (3.361)                     |
| PhenoAge                                         | −0.004 (4.139)                     |
| GrimAge                                          | 0.002 (2.706)                      |
| DunedinPACE                                      | 1.026 (0.108)                      |
| Age acceleration at visit 2                      |                                    |
| Hannum                                           | −0.003 (3.660)                     |
| Horvath                                          | −0.003 (3.615)                     |
| PhenoAge                                         | 0.002 (4.628)                      |
| GrimAge                                          | −0.003 (2.798)                     |
| DunedinPACE                                      | 1.036 (0.112)                      |
| Annual change in age acceleration between visits |                                    |
| Hannum                                           | 0.0005 (0.2895)                    |
| Horvath                                          | 0.0001 (0.2333)                    |
| PhenoAge                                         | 0.0004 (0.4566)                    |
| GrimAge                                          | −0.0012 (0.1982)                   |
| DunedinPACE                                      | 0.0017 (0.0115)                    |

The strongest associations were observed for second- and third-generation clocks, GrimAge, and DunedinPACE at either visit, with an estimated 3 to 9% increase in risk of

MCI. Associations of first-generation clocks were generally weaker, especially for visit 1 data. Further adjustment for education, language preference, and

**Table 2. Cross-sectional associations of global cognitive function at visit 1 and at visit 2 with epigenetic age acceleration (EAA) for 5 clocks at the same visit.**

| EAA Measure |              | Model 1 |       |                       |                      | Model 2 |       |                      |                      | Model 3 |       |                      |                      |
|-------------|--------------|---------|-------|-----------------------|----------------------|---------|-------|----------------------|----------------------|---------|-------|----------------------|----------------------|
|             |              | beta    | SE    | P-value               | Adj_P-value          | beta    | SE    | P-value              | Adj_P-value          | beta    | SE    | P-value              | Adj_P-value          |
| Visit 1     | Hannum       | −0.009  | 0.003 | $4.4 \times 10^{-3}$  | $2.2 \times 10^{-2}$ | −0.007  | 0.003 | $1.6 \times 10^{-2}$ | $8.0 \times 10^{-2}$ | −0.007  | 0.003 | $2.1 \times 10^{-2}$ | $1.1 \times 10^{-1}$ |
|             | Horvath      | −0.011  | 0.003 | $8.3 \times 10^{-4}$  | $4.2 \times 10^{-3}$ | −0.008  | 0.003 | $2.9 \times 10^{-3}$ | $1.5 \times 10^{-2}$ | −0.008  | 0.003 | $4.6 \times 10^{-3}$ | $2.3 \times 10^{-2}$ |
|             | PhenoAge     | −0.011  | 0.003 | $1.7 \times 10^{-5}$  | $8.5 \times 10^{-5}$ | −0.008  | 0.002 | $6.8 \times 10^{-4}$ | $3.4 \times 10^{-3}$ | −0.007  | 0.002 | $2.2 \times 10^{-3}$ | $1.1 \times 10^{-2}$ |
|             | GrimAge      | −0.018  | 0.004 | $9.1 \times 10^{-6}$  | $4.6 \times 10^{-5}$ | −0.012  | 0.004 | $8.0 \times 10^{-4}$ | $4.0 \times 10^{-3}$ | −0.011  | 0.004 | $3.8 \times 10^{-3}$ | $1.9 \times 10^{-2}$ |
|             | DunedinPACE* | −0.011  | 0.002 | $6.5 \times 10^{-10}$ | $3.3 \times 10^{-9}$ | −0.008  | 0.002 | $9.6 \times 10^{-7}$ | $4.8 \times 10^{-6}$ | −0.007  | 0.002 | $1.3 \times 10^{-5}$ | $6.5 \times 10^{-5}$ |
| Visit 2     | Hannum       | −0.013  | 0.004 | $9.0 \times 10^{-4}$  | $4.5 \times 10^{-3}$ | −0.010  | 0.003 | $2.7 \times 10^{-3}$ | $1.4 \times 10^{-2}$ | −0.009  | 0.003 | $5.7 \times 10^{-3}$ | $2.9 \times 10^{-2}$ |
|             | Horvath      | −0.013  | 0.004 | $8.0 \times 10^{-4}$  | $4.0 \times 10^{-3}$ | −0.010  | 0.003 | $2.4 \times 10^{-3}$ | $1.2 \times 10^{-2}$ | −0.010  | 0.003 | $3.9 \times 10^{-3}$ | $2.0 \times 10^{-2}$ |
|             | PhenoAge     | −0.016  | 0.003 | $9.5 \times 10^{-8}$  | $4.8 \times 10^{-7}$ | −0.014  | 0.003 | $1.6 \times 10^{-7}$ | $8.0 \times 10^{-7}$ | −0.011  | 0.002 | $3.3 \times 10^{-6}$ | $1.7 \times 10^{-5}$ |
|             | GrimAge      | −0.032  | 0.005 | $3.3 \times 10^{-10}$ | $1.7 \times 10^{-9}$ | −0.026  | 0.004 | $6.3 \times 10^{-9}$ | $3.2 \times 10^{-8}$ | −0.024  | 0.005 | $2.7 \times 10^{-7}$ | $1.4 \times 10^{-6}$ |
|             | DunedinPACE* | −0.013  | 0.002 | $2.2 \times 10^{-10}$ | $1.1 \times 10^{-9}$ | −0.009  | 0.002 | $1.7 \times 10^{-7}$ | $8.5 \times 10^{-7}$ | −0.008  | 0.002 | $1.6 \times 10^{-5}$ | $8.5 \times 10^{-5}$ |

Model 1: Adjusted for age, gender, center, and Hispanic background; Model 2: Adjusted for variables in Model 1 + years of education, language preference; Model 3: Adjusted for variables in Model 2 + cardiovascular health score (Life's Simple 7 category); Adj\_P-value: P-value adjusted for the number of clocks; \*DunedinPACE was rescaled to allow for comparison with other clocks (P-value shown for association on the original scale).

**Table 3. Association of MCI status at visit 2 with age acceleration (EAA) for 5 clocks at visit 1 (V1) and visit 2 (V2).**

| EAA Measure     | Model 1 |            |                      |                      | Model 2 |            |                      |                      | Model 3 |            |                      |                      |
|-----------------|---------|------------|----------------------|----------------------|---------|------------|----------------------|----------------------|---------|------------|----------------------|----------------------|
|                 | OR      | 95% CI     | P-value              | Adj_P-value          | OR      | 95% CI     | P-value              | Adj_P-value          | OR      | 95% CI     | P-value              | Adj_P-value          |
| V1 Hannum       | 1.03    | 1.00; 1.06 | $1.6 \times 10^{-2}$ | $8.0 \times 10^{-2}$ | 1.03    | 1.00; 1.06 | $2.4 \times 10^{-2}$ | $1.2 \times 10^{-1}$ | 1.03    | 1.00; 1.06 | $5.3 \times 10^{-2}$ | $2.7 \times 10^{-1}$ |
| V1 Horvath      | 1.04    | 1.01; 1.07 | $7.2 \times 10^{-3}$ | $3.6 \times 10^{-2}$ | 1.04    | 1.01; 1.07 | $1.1 \times 10^{-2}$ | $5.5 \times 10^{-2}$ | 1.03    | 1.00; 1.06 | $2.6 \times 10^{-2}$ | $1.3 \times 10^{-1}$ |
| V1 PhenoAge     | 1.03    | 1.01; 1.06 | $5.7 \times 10^{-3}$ | $2.9 \times 10^{-2}$ | 1.03    | 1.01; 1.05 | $1.3 \times 10^{-2}$ | $6.5 \times 10^{-2}$ | 1.02    | 1.00; 1.05 | $7.5 \times 10^{-2}$ | $3.8 \times 10^{-1}$ |
| V1 GrimAge      | 1.07    | 1.04; 1.11 | $5.4 \times 10^{-5}$ | $2.7 \times 10^{-4}$ | 1.07    | 1.03; 1.11 | $1.0 \times 10^{-4}$ | $5.0 \times 10^{-4}$ | 1.06    | 1.02; 1.10 | $3.5 \times 10^{-3}$ | $1.8 \times 10^{-2}$ |
| V1 DunedinPACE* | 1.04    | 1.03; 1.06 | $1.5 \times 10^{-7}$ | $7.5 \times 10^{-7}$ | 1.04    | 1.02; 1.05 | $9.2 \times 10^{-7}$ | $4.6 \times 10^{-6}$ | 1.03    | 1.02; 1.05 | $1.0 \times 10^{-4}$ | $5.0 \times 10^{-4}$ |
| V2 Hannum       | 1.04    | 1.01; 1.07 | $4.3 \times 10^{-3}$ | $2.2 \times 10^{-2}$ | 1.04    | 1.01; 1.06 | $5.7 \times 10^{-3}$ | $2.9 \times 10^{-2}$ | 1.03    | 1.00; 1.06 | $1.9 \times 10^{-2}$ | $9.5 \times 10^{-2}$ |
| V2 Horvath      | 1.04    | 1.02; 1.07 | $1.0 \times 10^{-3}$ | $5.0 \times 10^{-3}$ | 1.04    | 1.02; 1.07 | $1.5 \times 10^{-3}$ | $7.5 \times 10^{-3}$ | 1.04    | 1.01; 1.07 | $4.6 \times 10^{-3}$ | $2.3 \times 10^{-2}$ |
| V2 PhenoAge     | 1.04    | 1.02; 1.05 | $2.0 \times 10^{-4}$ | $1.0 \times 10^{-3}$ | 1.04    | 1.02; 1.05 | $3.0 \times 10^{-4}$ | $1.5 \times 10^{-3}$ | 1.03    | 1.01; 1.05 | $4.7 \times 10^{-3}$ | $2.4 \times 10^{-2}$ |
| V2 GrimAge      | 1.09    | 1.05; 1.12 | $1.4 \times 10^{-6}$ | $7.0 \times 10^{-6}$ | 1.09    | 1.05; 1.13 | $1.4 \times 10^{-6}$ | $7.0 \times 10^{-6}$ | 1.07    | 1.03; 1.11 | $1.2 \times 10^{-4}$ | $6.0 \times 10^{-4}$ |
| V2 DunedinPACE* | 1.03    | 1.02; 1.05 | $2.3 \times 10^{-6}$ | $1.2 \times 10^{-5}$ | 1.03    | 1.02; 1.05 | $7.6 \times 10^{-6}$ | $3.8 \times 10^{-5}$ | 1.02    | 1.01; 1.04 | $5 \times 10^{-4}$   | $2.5 \times 10^{-3}$ |

Model 1: Adjusted for age, gender, center, and Hispanic background; Model 2: Adjusted for variables in Model 1 + years of education, language preference; Model 3: Adjusted for variables in Model 2 + cardiovascular health (Life's Simple 7 category); Adj\_P-value: P-value adjusted for the number of clocks; \*DunedinPACE was rescaled to allow for comparison with other clocks (P-value shown for association on the original scale).

cardiovascular health mildly attenuated association results for all clocks but, except for Hannum and PhenoAge measured at visit 1, associations remained significant.

Associations of epigenetic clocks with the presence of significant cognitive decline at visit 2 are shown in Table 4. There were significant associations of second- and third-generation clocks PhenoAge, GrimAge, and DunedinPACE measured at visit 2 with presence of significant cognitive decline (Odds Ratio (OR) = 1.02 to 1.07,  $P = 7.1 \times 10^{-6}$  to  $9.0 \times 10^{-3}$ ). When epigenetic

clocks were measured at visit 1, only GrimAge was significantly associated with presence of significant cognitive decline (OR = 1.05,  $P = 1.6 \times 10^{-3}$ ). These associations remained significant with further adjustment for education, language preference, and cardiovascular health. When cognitive change between the two visits was modeled as a quantitative trait, greater age acceleration measured at visit 1 or visit 2 was associated with decline in global cognitive function between visits for all clocks, although associations were weaker or not statistically significant for first-generation clocks (Supplementary Table 4).

**Table 4. Association of presence of significant cognitive decline at visit 2 with epigenetic age acceleration (EAA) for 5 clocks at visit 1 and visit 2.**

| EAA Measure     | Model 1 |            |                      |                      | Model 2 |            |                      |                      | Model 3 |            |                      |                      |
|-----------------|---------|------------|----------------------|----------------------|---------|------------|----------------------|----------------------|---------|------------|----------------------|----------------------|
|                 | OR      | 95% CI     | P-value              | Adj_P-value          | OR      | 95% CI     | P-value              | Adj_P-value          | OR      | 95% CI     | P-value              | Adj_P-value          |
| V1 Hannum       | 1.01    | 0.99; 1.03 | 0.29                 | 1.00                 | 1.01    | 0.99; 1.04 | 0.28                 | 1.00                 | 1.01    | 0.99; 1.04 | 0.32                 | 1.00                 |
| V1 Horvath      | 1.01    | 0.98; 1.03 | 0.59                 | 1.00                 | 1.01    | 0.98; 1.03 | 0.57                 | 1.00                 | 1.01    | 0.98; 1.03 | 0.63                 | 1.00                 |
| V1 PhenoAge     | 1.01    | 0.99; 1.03 | 0.27                 | 1.00                 | 1.01    | 0.99; 1.03 | 0.24                 | 1.00                 | 1.01    | 0.99; 1.03 | 0.37                 | 1.00                 |
| V1 GrimAge      | 1.05    | 1.02; 1.08 | $1.6 \times 10^{-3}$ | $8.0 \times 10^{-3}$ | 1.05    | 1.02; 1.08 | $9.0 \times 10^{-4}$ | $4.5 \times 10^{-3}$ | 1.04    | 1.02; 1.08 | $3.0 \times 10^{-3}$ | $1.5 \times 10^{-2}$ |
| V1 DunedinPACE* | 1.01    | 1.00; 1.02 | 0.06                 | 0.30                 | 1.01    | 1.00; 1.03 | $4.4 \times 10^{-2}$ | 0.22                 | 1.01    | 1.00; 1.02 | 0.10                 | 1.00                 |
| V2 Hannum       | 1.01    | 0.99; 1.03 | 0.32                 | 1.00                 | 1.01    | 0.99; 1.03 | 0.29                 | 1.00                 | 1.01    | 0.99; 1.03 | 0.37                 | 1.00                 |
| V2 Horvath      | 1.01    | 0.99; 1.03 | 0.44                 | 1.00                 | 1.01    | 0.99; 1.03 | 0.42                 | 1.00                 | 1.01    | 0.99; 1.03 | 0.50                 | 1.00                 |
| V2 PhenoAge     | 1.02    | 1.01; 1.04 | $9.0 \times 10^{-3}$ | $4.5 \times 10^{-2}$ | 1.02    | 1.01; 1.04 | $7.0 \times 10^{-3}$ | $3.5 \times 10^{-2}$ | 1.02    | 1.00; 1.04 | $2.0 \times 10^{-2}$ | 0.10                 |
| V2 GrimAge      | 1.07    | 1.04; 1.10 | $7.1 \times 10^{-6}$ | $3.6 \times 10^{-5}$ | 1.07    | 1.04; 1.10 | $2.8 \times 10^{-6}$ | $1.4 \times 10^{-5}$ | 1.07    | 1.04; 1.10 | $1.2 \times 10^{-5}$ | $6.0 \times 10^{-5}$ |
| V2 DunedinPACE* | 1.02    | 1.01; 1.03 | $8.0 \times 10^{-4}$ | $4.0 \times 10^{-3}$ | 1.02    | 1.01; 1.03 | $5.0 \times 10^{-4}$ | $2.5 \times 10^{-3}$ | 1.02    | 1.01; 1.03 | $1.5 \times 10^{-3}$ | $7.5 \times 10^{-3}$ |

Model 1: Adjusted for age, gender, center, and Hispanic background; Model 2: Adjusted for variables in Model 1 + years of education, language preference; Model 3: Adjusted for variables in Model 2 + cardiovascular health (Life's Simple 7 category); Adj\_P-value: P-value adjusted for the number of clocks; \*DunedinPACE was rescaled to allow for comparison with other clocks (P-value shown for association on the original scale).

**Table 5. Association of global cognitive function change with change ( $\Delta$ ) in epigenetic age acceleration (EAA) between visit 1 and visit 2 for 5 clocks.**

| EAA Measure           | Model 1 |       |              |             | Model 2 |       |              |              | Model 3 |       |              |             |
|-----------------------|---------|-------|--------------|-------------|---------|-------|--------------|--------------|---------|-------|--------------|-------------|
|                       | beta    | SE    | P-value      | Adj_P-value | beta    | SE    | P-value      | Adj_P-value  | beta    | SE    | P-value      | Adj_P-value |
| $\Delta$ Hannum       | 0.024   | 0.067 | 0.718        | 1.00        | 0.025   | 0.067 | 0.711        | 1.00         | 0.035   | 0.068 | 0.605        | 1.00        |
| $\Delta$ Horvath      | -0.065  | 0.083 | 0.436        | 1.00        | -0.066  | 0.083 | 0.427        | 1.00         | -0.059  | 0.083 | 0.477        | 1.00        |
| $\Delta$ PhenoAge     | -0.099  | 0.043 | <b>0.021</b> | 0.105       | -0.106  | 0.042 | <b>0.013</b> | 0.065        | -0.097  | 0.043 | <b>0.024</b> | 0.12        |
| $\Delta$ GrimAge      | -0.239  | 0.099 | <b>0.016</b> | 0.08        | -0.256  | 0.099 | <b>0.009</b> | <b>0.045</b> | -0.238  | 0.099 | <b>0.016</b> | 0.08        |
| $\Delta$ DunedinPACE* | -0.043  | 0.028 | 0.121        | 0.605       | -0.043  | 0.028 | 0.125        | 0.625        | -0.037  | 0.028 | 0.187        | 0.93        |

Model 1: Adjusted for V1 age acceleration, age, gender, center, and Hispanic background; Model 2: Adjusted for variables in Model 1 + years of education, language preference; Model 3: Adjusted for variables in Model 2 + cardiovascular health (Life's Simple 7 category); Adj\_P-value: P-value adjusted for the number of clocks; \*DunedinPACE was rescaled to allow for comparison with other clocks (P-value shown for association on the original scale).

### Longitudinal associations of epigenetic clocks with cognitive aging measures

We next examined the association of change in global cognitive function with change in epigenetic clocks between the two visits (Table 5). Controlling for visit 1 PhenoAge acceleration, an increase in PhenoAge acceleration from visit 1 to visit 2 was associated with a decline in global cognitive function between the two visits ( $P = 0.021$ ). Similarly, an increase in GrimAge acceleration, controlling for visit 1 GrimAge acceleration, was associated with a decline in global cognitive function between the two visits ( $P = 0.016$ ). Further adjustment for education, language preference, and cardiovascular health did not meaningfully change these results. Association of change in individual cognitive test scores with change in epigenetic clocks between the two visits showed varying

results (Supplementary Table 5). Change in PhenoAge acceleration was associated with a decline in B-SEVLT sum and DSST ( $P = 0.048$  and  $0.0006$ , respectively), while change in GrimAge acceleration was associated with a decline in WF and DSST ( $P = 0.015$  and  $0.0004$ , respectively). Interestingly, change in DunedinPACE between visits was also associated with decline in DSST, although adjusting for cardiovascular health mitigated this relationship.

Table 6 presents the association of change in epigenetic clocks between the two visits with presence of MCI and significant cognitive decline at visit 2. Increase in age acceleration between the two visits for PhenoAge, and GrimAge was associated with a greater risk of MCI, controlling for visit 1 age acceleration values (OR = 1.3, and 1.8;  $P = 0.017$  and  $0.010$ , respectively).

**Table 6. Association of presence of MCI and significant cognitive decline at visit 2 with change ( $\Delta$ ) in epigenetic age acceleration (EAA) between visit 1 and visit 2 for 5 clocks.**

| EAA Measure                   |                | Model 1 |            |                      |                      | Model 2 |            |                      |                      | Model 3 |            |                      |                      |
|-------------------------------|----------------|---------|------------|----------------------|----------------------|---------|------------|----------------------|----------------------|---------|------------|----------------------|----------------------|
|                               |                | OR      | 95% CI     | P-value              | Adj_P-value          | OR      | 95% CI     | P-value              | Adj_P-value          | OR      | 95% CI     | P-value              | Adj_P-value          |
| MCI                           | Δ Hannum       | 1.23    | 0.89; 1.69 | 0.21                 | 1.00                 | 1.23    | 0.89; 1.71 | 0.21                 | 1.00                 | 1.17    | 0.85; 1.63 | 0.34                 | 1.00                 |
|                               | Δ Horvath      | 1.46    | 1.00; 2.16 | 0.05                 | 0.25                 | 1.48    | 1.00; 2.19 | 0.05                 | 0.25                 | 1.43    | 1.03; 2.11 | 0.08                 | 0.40                 |
|                               | Δ PhenoAge     | 1.28    | 1.04; 1.57 | $1.7 \times 10^{-2}$ | 0.085                | 1.32    | 1.07; 1.62 | $9.0 \times 10^{-3}$ | $4.5 \times 10^{-2}$ | 1.26    | 1.02; 1.55 | $3.3 \times 10^{-2}$ | 0.17                 |
|                               | Δ GrimAge      | 1.85    | 1.16; 2.98 | $1.0 \times 10^{-2}$ | 0.05                 | 2.00    | 1.24; 3.24 | $4.0 \times 10^{-3}$ | $2.0 \times 10^{-2}$ | 1.86    | 1.15; 3.02 | $1.2 \times 10^{-2}$ | 0.06                 |
|                               | Δ DunedinPACE* | 1.07    | 0.94; 1.22 | 0.32                 | 1.00                 | 1.07    | 0.94; 1.23 | 0.29                 | 1.00                 | 1.04    | 0.91; 1.20 | 0.53                 | 1.00                 |
| Significant Cognitive Decline | Δ Hannum       | 1.03    | 0.79; 1.35 | 0.80                 | 1.00                 | 1.04    | 0.80; 1.36 | 0.75                 | 1.00                 | 1.02    | 0.78; 1.33 | 0.88                 | 1.00                 |
|                               | Δ Horvath      | 1.11    | 0.80; 1.54 | 0.54                 | 1.00                 | 1.12    | 0.80; 1.55 | 0.51                 | 1.00                 | 1.09    | 0.78; 1.52 | 0.61                 | 1.00                 |
|                               | Δ PhenoAge     | 1.30    | 1.09; 1.55 | $2.5 \times 10^{-3}$ | $1.2 \times 10^{-2}$ | 1.31    | 1.10; 1.56 | $2.2 \times 10^{-3}$ | $1.1 \times 10^{-2}$ | 1.28    | 1.08; 1.52 | $5.0 \times 10^{-3}$ | $2.5 \times 10^{-2}$ |
|                               | Δ GrimAge      | 2.19    | 1.47; 3.26 | $1.0 \times 10^{-4}$ | $5.0 \times 10^{-3}$ | 2.23    | 1.49; 3.33 | $8.1 \times 10^{-5}$ | $4.1 \times 10^{-4}$ | 2.20    | 1.47; 3.29 | $1.1 \times 10^{-4}$ | $5.5 \times 10^{-4}$ |
|                               | Δ DunedinPACE* | 1.20    | 1.07; 1.34 | $1.4 \times 10^{-3}$ | $7.0 \times 10^{-3}$ | 1.20    | 1.08; 1.35 | $1.0 \times 10^{-3}$ | $5.0 \times 10^{-3}$ | 1.20    | 1.07; 1.34 | $1.6 \times 10^{-3}$ | $8.0 \times 10^{-3}$ |

Model 1: Adjusted for V1 age acceleration, age, gender, center, and Hispanic background; Model 2: Adjusted for variables in Model 1 + years of education, language preference; Model 3: Adjusted for variables in Model 2 + cardiovascular health (Life's Simple 7 category); Adj\_P-value: P-value adjusted for the number of clocks; \*DunedinPACE was rescaled to allow for comparison with other clocks (P-value shown for association on the original scale).

Similar findings were observed for association between presence of significant cognitive decline and change in PhenoAge and GrimAge acceleration (OR = 1.3 and 2.2;  $P = 0.0025$  and  $0.0001$ , respectively). Between visit change in DunedinPACE was associated with a 20% greater risk of significant cognitive decline ( $P = 0.0014$ ). Further adjustment for education, language preference, and cardiovascular health did not meaningfully change these results.

### Comparison with APOE4 effects

We sought to compare the magnitude of effects of epigenetic clocks on measures of cognitive aging to the magnitude of effects of APOE4, a well-established genetic predictor of AD, on the same cognitive measures. However, in this sample, there was no association between APOE4 and measures of cognitive aging (not shown), except for between-visit change in DSST. The magnitude of effects of V1 second- and third-generation clocks PhenoAge, GrimAge, and DunedinPACE on between-visit decline in DSST was considerably smaller (3- to 8-fold) than that of APOE4 (Supplementary Table 6). In contrast, the magnitude of effects of between-visit change in age acceleration on decline in DSST was similar to that of APOE4 for PhenoAge and DunedinPACE, while it was almost 4-fold larger for GrimAge (Supplementary Table 6).

### Association of cognitive aging measures with surrogate biomarker components of GrimAge

We also evaluated the association of cognitive aging measures with acceleration in a new version of

GrimAge (GrimAge2 [13]) and with its 10 surrogate biomarker components. Acceleration in PC-based GrimAge, GrimAge (original version), and GrimAge2 performed similarly in association analyses of the various cognitive aging measures (Supplementary Table 7). Estimated effect sizes were slightly larger for PC-based GrimAge while strength of associations was slightly larger for GrimAge2, especially for V2 data. In addition, there were strong associations of several surrogate biomarker components of GrimAge2 with each of the cognitive aging measures (Supplementary Table 8). DNAm surrogate of hemoglobin A1C exhibited the strongest associations across cognitive aging measures and visits.

## DISCUSSION

Our study is the first to investigate the longitudinal association of epigenetic aging with cognitive aging in a large sample of Hispanic/Latino adults. We compared the association of five epigenetic clocks, including first-generation clocks Hannum and Horvath, second-generation clocks PhenoAge and GrimAge, and third-generation clock DunedinPACE, with multiple measures of cognitive aging. In line with published data [5, 14, 15], the five epigenetic clocks showed significant inter-correlations, with clocks from the same generation being more strongly correlated with one another and clocks from more distant generations being less strongly correlated. These results are consistent with the observation that different generation epigenetic clocks capture distinct aspects of the aging process. First-generation epigenetic clocks were developed to predict chronological age [6, 7]. Second-generation



epigenetic clocks were developed to predict mortality using various physiological biomarkers [8, 9]. Third-generation clock DunedinPACE was developed to predict change in health indicators from early adulthood to middle age [5].

In cross-sectional analyses, greater age acceleration of all clocks was associated with lower general and domain-specific cognitive function at each visit and with greater risk of MCI at visit 2, while only second- and third-generation clocks were associated with presence of significant cognitive decline at visit 2. Consistently, in longitudinal analyses, increase in second-generation clocks PhenoAge acceleration and GrimAge acceleration was associated with decline in global and domain-specific cognitive function between visits. Across all analyses, GrimAge acceleration and between-visit change in GrimAge acceleration had generally the strongest estimated association with cognitive aging, adding to the growing literature suggesting that accelerated GrimAge represents a valuable biomarker of declining brain health [16, 17]. GrimAge is a composite biomarker of blood DNAm surrogates of smoking pack-years and 7 plasma proteins, including adrenomedullin,  $\beta$ 2-microglobulin, growth differentiation factor 15, plasminogen activator inhibitor 1 and tissue inhibitor metalloproteinase 1. The new version of GrimAge, GrimAge2, additionally includes DNAm surrogates of hemoglobin A1C and C-reactive protein, and has been shown to outperform GrimAge in predicting mortality and age-related health conditions [13]. All these plasma proteins and smoking have been associated with cognitive impairment, cognitive decline, and dementia in animal models and human studies [18–26]. Consistently, DNAm surrogates of smoking and of several plasma protein components of GrimAge2 were associated with cognitive aging in our sample of middle-aged and older Hispanic/Latino adults. The strongest associations across measures of cognitive aging and visits were for hemoglobin A1C. This is in line with our recent report on the association of elevated plasma levels of hemoglobin A1C with cognitive decline and risk of MCI in this cohort [27]. It may also explain the slight outperformance of GrimAge2 over GrimAge in association analyses with cognitive aging in this sample.

Over 25 studies have investigated cross-sectional associations of one or more epigenetic clocks with measures of cognitive function in adulthood [28, 29], although none in a large sample of Hispanic/Latino middle-aged and older individuals. While these studies differed in their measures of cognitive performance and epigenetic clocks assessed, with few exceptions [30, 31], they reported a significant association of epigenetic aging with lower cognitive performance [15, 17, 32–40].

Our large sample size detected associations of all epigenetic clocks with global cognitive function at both visits, independent of education, language preference, and cardiovascular health. Consistent findings were observed for individual cognitive tests although associations of B-SEVLT tended to be weaker or non-significant with first-generation clocks.

In several studies, second- and third-generation clocks outperformed first-generation clocks in predicting cognitive performance [15, 17, 37, 40]. Similar to our findings, compared to other clocks, GrimAge acceleration showed the strongest associations with measures of cognitive function in 490 older adults from the Irish Longitudinal Study on Ageing [40], in 1115 middle-aged individuals from the Coronary Artery Risk Development in Young Adults (CARDIA) study [17], and in 3282 older adults from the Health and Retirement Study [37]. Moreover, across various studies examining the association of epigenetic clocks with specific cognitive domains, the most consistent findings were for GrimAge acceleration associated with episodic memory and processing speed [28]. In contrast, in 649 older adults from the Alzheimer's Disease Neuroimaging Initiative (ADNI), DunedinPACE showed stronger and more consistent associations with multiple measures of cognitive function than other epigenetic clocks, including GrimAge [15].

Few studies have examined the association of epigenetic clocks with longitudinal decline in cognitive function in middle-aged or older adults [17, 31, 41–43]. In all studies, there was an association of greater epigenetic age acceleration in at least one clock with faster cognitive decline over a follow-up period ranging from 5 to 15 years [17, 31, 41–43]. Consistent with our findings, in studies examining multiple generation clocks, significant associations with longitudinal decline in cognitive function were generally observed with second- or third-generation clocks but not first-generation clocks [17, 43].

The relationship between epigenetic clocks and MCI has not been widely studied. A study by Shadyab et al. found no association of accelerated epigenetic aging measured by first- and second-generation clocks with MCI in 578 elderly women (mean age 70 years) [44]. However, in a subset of 262 women who developed coronary heart disease during follow-up, a higher Horvath age acceleration was associated with greater MCI risk [44]. We observed significant associations between all clocks and MCI, with stronger associations identified for second- and third-generation clocks. Notably, associations of GrimAge acceleration with both MCI and presence of significant cognitive decline were observed with visit 1 measures, minimizing the

possibility of reverse causation. Interestingly, with some exceptions [15], studies investigating the association of epigenetic aging with clinical dementia have largely yielded null results [44–46] but all these studies suffered from a limited sample size. More recently, in the large Framingham Heart Study Offspring Cohort ( $N = 2264$ ), there were significant associations of acceleration in the Horvath, PhenoAge, GrimAge, and DunedinPACE epigenetic clocks with incident dementia, with stronger effects observed for second- and third-generation clocks, notably DunedinPACE [15].

Only one study in 750 middle-aged non-Hispanic White and African American adults from the CARDIA cohort (mean age 50 years) has examined the association of longitudinal change in epigenetic clocks with measures of cognitive aging, and reported no association between the 5-year change in GrimAge acceleration with 5-year change in cognitive function [17]. In contrast, we observed that a 7-year increase in age acceleration for second- and third-generation clocks was associated with significant cognitive decline over the same period and with a greater risk of MCI after accounting for visit 1 age acceleration, suggesting that longitudinal assessment of these clocks may provide additional value in predicting cognitive aging and impairment, beyond assessment at a single time point.

Age-related changes in DNA methylation caused by biological, environmental, and lifestyle factors are an important driver of brain aging and decline in brain and cognitive health [47]. The mechanisms underlying the relationship between epigenetic age acceleration and cognitive aging are unknown but may reflect changes in metabolism, immunity, and autophagy [48], and perhaps other biological pathways that may overlap with those implicated in learning and memory. Epigenetic clocks have been shown to be heritable and genome-wide association studies have identified multiple genetic loci [49]. Shared genetic variants between epigenetic aging and cognitive aging could also underlie the observed associations, as supported by significant genetic correlations of GrimAge and PhenoAge acceleration with cognitive traits [49]. Application of computational methods to elucidate the molecular mechanisms of epigenetic clocks have shown that their underlying CpGs cluster into 12 distinct modules and that epigenetic clocks differ in the relative contribution of each of these modules [50]. In particular, GrimAge was enriched for mortality-associated modules, while PhenoAge included both age-associated and mortality-associated modules [50]. These data suggest that these clocks likely capture various aging mechanisms. Whether the same or distinct mechanisms underlie the association of these clocks with cognitive aging remains to be determined.

Despite considerable strengths, including a large sample of Hispanic/Latino adults and a 7-year longitudinal assessment of cognitive and epigenetic aging, our study suffers from several limitations. First, despite robust associations, the magnitude of effects of epigenetic clocks on measure of cognitive aging was generally modest, although that of change in clocks over time was considerably larger and similar to APOE4 effects. Second, while we adjusted for education, language preference, and cardiovascular health, residual confounding may remain. Third, we have not examined possible sex differences in the association between epigenetic aging and cognitive aging. Age-related DNA methylation changes that differ by sex have been reported [51, 52], and future development of sex-specific epigenetic clocks may provide new avenues for addressing this important question. Fourth, only two time-points were available for both cognitive and epigenetic assessments, which may be more sensitive to random variation in the measurements rather than reflecting true trajectories. Additional data on a third visit will help address this concern. Fifth, our study focused on clocks that are markers of chronological age and biological age but did not consider other clock types such as telomere length [10] and mitotic age clocks [53, 54], which are markers of cellular aging. Studies are needed to examine whether the specific aging mechanisms tracked by these clocks are relevant to cognitive aging. Finally, our findings necessitate replication in other cohorts of Hispanic/Latino adults.

In conclusion, acceleration in second- and third-generation epigenetic clocks was associated with decline in cognitive health and cognitive impairment in middle-aged and older Hispanic/Latino adults. In particular, GrimAge showed the strongest associations across measures of cognitive aging. With further validation, it may represent a valuable biomarker that may help identify individuals at risk of accelerated cognitive decline, who may benefit from early interventions to maintain or improve brain health. Repeated assessment of GrimAge may provide additional information about the continuous changes in the aging process and may be helpful for monitoring effectiveness of health-related interventions to improve cognitive health.

## METHODS

### Study participants

Participants were selected from the Study of Latinos Investigation of Neurocognitive Aging (SOL-INCA), an ancillary study of the Hispanic Community Health Study/Study of Latinos (HCHS/SOL). The design,



cohort selection and recruitment for HCHS/SOL and SOL-INCA have been previously described [55–57]. Briefly, at the HCHS/SOL visit 1 (2008–2011), 16,415 Hispanic/Latino adults (ages 18–74) from six backgrounds (Central American, Cuban, Dominican, Mexican, Puerto Rican and South American) were enrolled from communities in the Bronx, NY; Chicago, IL; Miami, FL; and San Diego, CA. At visit 1, participants older than 45 years of age underwent a cognitive assessment and were re-assessed at visit 2 (2015–2018) as part of SOL-INCA ( $N = 6377$ ). SOL-INCA follows the complex study design of HCHS/SOL, including a multistage sampling strategy with stratification and clustering, and probability weights that account for non-response and attrition and permit valid inferences to targeted Latino populations in Bronx, Chicago, Miami, San Diego [55, 57].

For DNA methylation assessment, SOL-INCA participants with MCI and cognitively healthy controls from specified age and sex strata were selected ( $N = 2800$ ). The sampling strategy's objective was to include all identified MCI cases identified in SOL-INCA and oversample cognitively normal participants from matching age and sex strata. The study was approved by the institutional review boards at each of the participating institutions. All human subjects provided written informed consent.

### Assessment of cognitive abilities and outcomes

Participants completed all assessments at each visit in their preferred language (Spanish or English). The neurocognitive tests administered at both visits were the Brief-Spanish English Verbal Learning Test B-SEVLT (sum and recall), which assesses verbal episodic learning and memory [58]; the Word Fluency Test (WFT) of the Multilingual Aphasia Examination, which assesses verbal fluency [59]; the Digit Symbol Substitution Test (DSST) of the Wechsler Adult Intelligence Scale-Revised, which assesses psychomotor speed and sustained attention [60]; and the Six-Item Screener (SIS) derived from the Mini-Mental Status exam, which assesses mental status [61].

The primary outcomes of the study include a global cognitive function measure calculated at each visit as the average z-scores of B-SEVLT sum, B-SEVLT recall, WFT, and DSST scores; and the change in global cognition measure derived using a survey regression model to predict the cognitive score at visit 2 as a function of visit 1 cognitive score adjusting for the time elapsed between assessments. The global cognitive change value was calculated as  $(T2 - T2_{pred})/RMSE$ , where  $T2$  represents the participant's global cognitive function score at visit 2,  $T2_{pred}$  is the predicted score,

and RMSE is the root mean squared error of the fitted model. Details about this method have been published previously [62]. Two binary cognitive outcomes assessed at visit 2 were also analyzed: presence of significant cognitive decline and MCI. Significant cognitive decline between the two visits was assessed based on a latent change score model that takes into account cognitive test scores [57]. Presence of significant cognitive decline was defined as a change in global cognitive function score between the two visits exceeding  $-0.055$  standard deviation (SD) per year. MCI was assessed according to the National Institute on Aging-Alzheimer's Association (NIA-AA) criteria [63] as described previously [57]. Briefly, a participant was classified with MCI if three conditions were satisfied: (1) any cognitive test score  $\leq -1$  standard deviation (SD) of the SOL-INCA robust norms adjusted for age, sex, education, and Picture Vocabulary Test scores, (2) a global cognition function decline by more than  $0.055$  SD per year between the visits, and (3) a participant self-reported cognitive decline based on an Everyday Cognition questionnaire [57].

### DNA methylation data

Genomic DNA was isolated from frozen peripheral blood leukocytes in the Advanced Research and Diagnostics Laboratory at the University of Minnesota using the FlexSTAR+ automated workflow (Autogen; Holliston, MA, USA) and provided to the Human Genetics Center Laboratory at the University of Texas Health Science Center at Houston for further processing. All sample handling used uniquely 2D barcoded Matrix vials (Thermo Fisher Scientific; Waltham, MA, USA) integrated with the Human Genetics Center Laboratory Information Management System (LIMS). To minimize technical confounding and batch effects, samples were randomized to arrays so that visit 1 and visit 2 samples from a participant were placed on the same array and that there was approximately the same ratio of MCI cases to normal controls across arrays. Samples were randomly dispersed based on gender, Hispanic background, and field center. Approximately 500 ng of genomic DNA was bisulfite converted using the EZ-96 DNA Methylation Kit (Zymo Research Corporation; Irvine, CA, USA) and DNA methylation levels across ~850,000 sites were measured using the Infinium MethylationEPIC v1.0 BeadChip (Illumina, Inc.; San Diego, CA, USA) using the manufacturer's recommended protocols. Laboratory quality control included use of the BeadArray Controls Reporter (BACR) tool (Illumina, Inc.; San Diego, CA, USA) for review and exclusion of samples with poor bisulfite conversion efficiency, lower than normal staining, and poor hybridization. DNA methylation data were

subjected to a comprehensive quality control (QC) protocol that uses both control-probe and data driven methods to filter out low-quality and questionable samples and probes. Probe signal detection and QC was performed using SeSaMe [64], which derives a *p*-value with out-of-band (OOB) array hybridization (pOOBAH) for signal detection for each probe and performs probe masking based on known EPIC array design issues as well as the signal detection *p*-value (Probes with pOOBAH <0.05 are masked). A total of 109,978 probes were masked after QC. Samples with sex mismatch, genotype mismatch, and those of poor quality (i.e., outliers in M-U plots, *outlyx*, and *bscon*) [65] were excluded (*N* = 65). A total of 2671 participants had DNA methylation data at both visits.

### Epigenetic clocks estimations

Principal component (PC)-trained clocks were estimated according to the method developed by Higgins-Chen et al. [66]. This method uses principal component analysis (PCA) to reduce variance in estimates of epigenetic age resulting from technical noise at individual CpG sites by leveraging multicollinearity in the data. At each visit, PC-trained DNA methylation age estimates were derived for four clocks: First-generation clocks, Horvath [7] and Hannum [6]; and second-generation clocks, PhenoAge [8] and GrimAge [9]. We also estimated a third-generation clock, DunedinPACE following the procedure described by Belsky et al. [5]. At each visit, estimates of age acceleration for each clock were calculated as the residuals from a linear regression of the DNA methylation age estimates on the chronological age. For each clock, change in age acceleration between the two visits was calculated as the difference in age acceleration between the two visits divided by the time (in years) between visits. To permit comparison with other clocks, DunedinPACE was rescaled by multiplying each value by the chronological age and deriving an “acceleration” measure as done for the other clocks.

### Statistical analysis

Descriptive statistics included pairwise Pearson’s *r* correlation coefficients which were calculated to characterize the degree to which the various DNA methylation age estimates are related to one another and to chronological age at each visit, and across visits. Linear regression models were used to evaluate the associations of each measure of age acceleration with a global cognitive function score at each visit and with change in global cognitive function score between the two visits. Logistic regression models were used to evaluate the association of measures of age acceleration with presence of significant cognitive decline and with

presence of MCI at V2. Model 1 was adjusted for age, sex, center and Hispanic background. Model 2 included additional adjustment for years of education and language preference. Model 3 also included adjustment for a measure of cardiovascular health (AHA Life’s Simple 7) [67]. In addition to raw *P*-values, we present *P*-values corrected for the number of clocks evaluated.

### Abbreviations

DNAm: DNA methylation; MCI: Mild cognitive impairment; AHA: American Heart Association; B-SEVLT: Brief-Spanish English Verbal Learning Test; WF: Word Fluency; DSST: Digit Symbol Substitution Test; OR: Odds ratio; SOL-INCA: Study of Latinos-Investigation of Neurocognitive Aging; PC: Principal component.

### AUTHOR CONTRIBUTIONS

The study was conceptualized by M.F. and H.G. Data collection and analysis were performed by M.F., H.G, W.T., and R.X. The first draft of the manuscript was written by M.F., and all authors commented on different versions of the manuscript. All authors read and approved the final manuscript.

### ACKNOWLEDGMENTS

The authors thank the staff and participants of HCHS/SOL for their important contributions. A complete list of staff and investigators is available on the study website <http://www.csc.unc.edu/hchs/>.

### CONFLICTS OF INTEREST

The authors declare no conflicts of interest related to this study.

### ETHICAL STATEMENT AND CONSENT

The study was approved by the institutional review board at the University of Texas Health Science Center at Houston (HSC-IMM-15-0557) and at each of the participating institutions. All study participants provided written informed consent.

### FUNDING

This work was supported by grant RF1 AG061022, R01 AG075758, and RF1 AG077639. The Hispanic Community Health Study/Study of Latinos is a collaborative study supported by contracts from the National Heart, Lung, and Blood Institute (NHLBI) to the University of North Carolina (HHSN268201300001I/N01-HC-65233), University of

Miami (HHSN268201300004I/N01-HC-65234), Albert Einstein College of Medicine (HHSN268201300002I/N01-HC-65235), University of Illinois at Chicago (HHSN268201300003I/N01-HC-65236 Northwestern University), and San Diego State University (HHSN268201300005I/N01-HC-65237). The following Institutes/Centers/Offices have contributed to the HCHS/SOL through a transfer of funds to the NHLBI: National Institute on Minority Health and Health Disparities, National Institute on Deafness and Other Communication Disorders, National Institute of Dental and Craniofacial Research, National Institute of Diabetes and Digestive and Kidney Diseases, National Institute of Neurological Disorders and Stroke, NIH Institution-Office of Dietary Supplements.

## REFERENCES

- Kyriazis M. Aging as "Time-Related Dysfunction": A Perspective. *Front Med (Lausanne)*. 2020; 7:371. <https://doi.org/10.3389/fmed.2020.00371> PMID:32850891
- Jazwinski SM, Kim S. Examination of the Dimensions of Biological Age. *Front Genet*. 2019; 10:263. <https://doi.org/10.3389/fgene.2019.00263> PMID:30972107
- Rakyan VK, Down TA, Maslau S, Andrew T, Yang TP, Beyan H, Whittaker P, McCann OT, Finer S, Valdes AM, Leslie RD, Deloukas P, Spector TD. Human aging-associated DNA hypermethylation occurs preferentially at bivalent chromatin domains. *Genome Res*. 2010; 20:434–9. <https://doi.org/10.1101/gr.103101.109> PMID:20219945
- Fraga MF, Ballestar E, Paz MF, Ropero S, Setien F, Ballestar ML, Heine-Suñer D, Cigudosa JC, Urioste M, Benitez J, Boix-Chornet M, Sanchez-Aguilera A, Ling C, et al. Epigenetic differences arise during the lifetime of monozygotic twins. *Proc Natl Acad Sci U S A*. 2005; 102:10604–9. <https://doi.org/10.1073/pnas.0500398102> PMID:16009939
- Belsky DW, Caspi A, Corcoran DL, Sugden K, Poulton R, Arseneault L, Baccarelli A, Chamarti K, Gao X, Hannon E, Harrington HL, Houts R, Kothari M, et al. DunedinPACE, a DNA methylation biomarker of the pace of aging. *Elife*. 2022; 11:e73420. <https://doi.org/10.7554/eLife.73420> PMID:35029144
- Hannum G, Guinney J, Zhao L, Zhang L, Hughes G, Sada S, Klotzle B, Bibikova M, Fan JB, Gao Y, Deconde R, Chen M, Rajapakse I, et al. Genome-wide methylation profiles reveal quantitative views of human aging rates. *Mol Cell*. 2013; 49:359–67. <https://doi.org/10.1016/j.molcel.2012.10.016> PMID:23177740
- Horvath S. DNA methylation age of human tissues and cell types. *Genome Biol*. 2013; 14:R115. <https://doi.org/10.1186/gb-2013-14-10-r115> PMID:24138928
- Levine ME, Lu AT, Quach A, Chen BH, Assimes TL, Bandinelli S, Hou L, Baccarelli AA, Stewart JD, Li Y, Whitsel EA, Wilson JG, Reiner AP, et al. An epigenetic biomarker of aging for lifespan and healthspan. *Aging (Albany NY)*. 2018; 10:573–91. <https://doi.org/10.18632/aging.101414> PMID:29676998
- Lu AT, Quach A, Wilson JG, Reiner AP, Aviv A, Raj K, Hou L, Baccarelli AA, Li Y, Stewart JD, Whitsel EA, Assimes TL, Ferrucci L, Horvath S. DNA methylation GrimAge strongly predicts lifespan and healthspan. *Aging (Albany NY)*. 2019; 11:303–27. <https://doi.org/10.18632/aging.101684> PMID:30669119
- Lu AT, Seebboth A, Tsai PC, Sun D, Quach A, Reiner AP, Kooperberg C, Ferrucci L, Hou L, Baccarelli AA, Li Y, Harris SE, Corley J, et al. DNA methylation-based estimator of telomere length. *Aging (Albany NY)*. 2019; 11:5895–923. <https://doi.org/10.18632/aging.102173> PMID:31422385
- Weidner CI, Lin Q, Koch CM, Eisele L, Beier F, Ziegler P, Bauerschlag DO, Jöckel KH, Erbel R, Mühleisen TW, Zenke M, Brummendorf TH, Wagner W. Aging of blood can be tracked by DNA methylation changes at just three CpG sites. *Genome Biol*. 2014; 15:R24. <https://doi.org/10.1186/gb-2014-15-2-r24> PMID:24490752
- Margiotti K, Monaco F, Fabiani M, Mesoraca A, Giorlandino C. Epigenetic Clocks: In Aging-Related and Complex Diseases. *Cytogenet Genome Res*. 2023; 163:247–56. <https://doi.org/10.1159/000534561> PMID:37899027
- Lu AT, Binder AM, Zhang J, Yan Q, Reiner AP, Cox SR, Corley J, Harris SE, Kuo PL, Moore AZ, Bandinelli S, Stewart JD, Wang C, et al. DNA methylation GrimAge version 2. *Aging (Albany NY)*. 2022; 14:9484–549. <https://doi.org/10.18632/aging.204434> PMID:36516495
- Crimmins EM, Thyagarajan B, Levine ME, Weir DR, Faul J. Associations of Age, Sex, Race/Ethnicity, and Education With 13 Epigenetic Clocks in a Nationally Representative U.S. Sample: The Health and Retirement Study. *J Gerontol A Biol Sci Med Sci*. 2021; 76:1117–23.

<https://doi.org/10.1093/gerona/qlab016>

PMID:33453106

15. Sugden K, Caspi A, Elliott ML, Bourassa KJ, Chamarti K, Corcoran DL, Hariri AR, Houts RM, Kothari M, Kritchevsky S, Kuchel GA, Mill JS, Williams BS, et al, and Alzheimer's Disease Neuroimaging Initiative\*. Association of Pace of Aging Measured by Blood-Based DNA Methylation With Age-Related Cognitive Impairment and Dementia. *Neurology*. 2022; 99:e1402–13.  
<https://doi.org/10.1212/WNL.0000000000200898>  
PMID:35794023
16. Hillary RF, Stevenson AJ, Cox SR, McCartney DL, Harris SE, Seeboth A, Higham J, Sproul D, Taylor AM, Redmond P, Corley J, Pattie A, Hernández MDC, et al. An epigenetic predictor of death captures multi-modal measures of brain health. *Mol Psychiatry*. 2021; 26:3806–16.  
<https://doi.org/10.1038/s41380-019-0616-9>  
PMID:31796892
17. Zheng Y, Habes M, Gonzales M, Pomponio R, Nasrallah I, Khan S, Vaughan DE, Davatzikos C, Seshadri S, Launer L, Sorond F, Sedaghat S, Wainwright D, et al. Mid-life epigenetic age, neuroimaging brain age, and cognitive function: coronary artery risk development in young adults (CARDIA) study. *Aging (Albany NY)*. 2022; 14:1691–712.  
<https://doi.org/10.18632/aging.203918>  
PMID:35220276
18. Bašić J, Milošević V, Djordjević B, Stojiljković V, Živanović M, Stefanović N, Aracki Trenkić A, Stojanov D, Jevtović Stoimenov T, Stojanović I. Matrix Remodeling Enzymes as Potential Fluid Biomarkers of Neurodegeneration in Alzheimer's Disease. *Int J Mol Sci*. 2024; 25:5703.  
<https://doi.org/10.3390/ijms25115703>  
PMID:38891891
19. Arce Rentería M, Gillett SR, McClure LA, Wadley VG, Glasser SP, Howard VJ, Kissela BM, Unverzagt FW, Jenny NS, Manly JJ, Cushman M. C-reactive protein and risk of cognitive decline: The REGARDS study. *PLoS One*. 2020; 15:e0244612.  
<https://doi.org/10.1371/journal.pone.0244612>  
PMID:33382815
20. Oh J, Lee HJ, Song JH, Park SI, Kim H. Plasminogen activator inhibitor-1 as an early potential diagnostic marker for Alzheimer's disease. *Exp Gerontol*. 2014; 60:87–91.  
<https://doi.org/10.1016/j.exger.2014.10.004>  
PMID:25304332
21. Walker KA, Chen J, Shi L, Yang Y, Fornage M, Zhou L, Schlosser P, Surapaneni A, Grams ME, Duggan MR, Peng Z, Gomez GT, Tin A, et al. Proteomics analysis of plasma from middle-aged adults identifies protein markers of dementia risk in later life. *Sci Transl Med*. 2023; 15:eadf5681.  
<https://doi.org/10.1126/scitranslmed.adf5681>  
PMID:37467317
22. Yaffe K, Lindquist K, Shlipak MG, Simonsick E, Fried L, Rosano C, Satterfield S, Atkinson H, Windham BG, Kurella-Tamura M. Cystatin C as a marker of cognitive function in elders: findings from the health ABC study. *Ann Neurol*. 2008; 63:798–802.  
<https://doi.org/10.1002/ana.21383>  
PMID:18496846
23. Smith LK, He Y, Park JS, Bieri G, Snethlage CE, Lin K, Gontier G, Wabl R, Plambeck KE, Udeochu J, Wheatley EG, Bouchard J, Eggel A, et al.  $\beta$ 2-microglobulin is a systemic pro-aging factor that impairs cognitive function and neurogenesis. *Nat Med*. 2015; 21:932–7.  
<https://doi.org/10.1038/nm.3898>  
PMID:26147761
24. Li K, Xu J, Zhao M, Wu J, Mei Y, Zhou Q, Zhao J, Li Y, Yang M, Xu Q. Serum cystatin C and mild cognitive impairment: The mediating role of glucose homeostasis. *Front Aging Neurosci*. 2023; 15:1102762.  
<https://doi.org/10.3389/fnagi.2023.1102762>  
PMID:37056689
25. Lee S, Byun MS, Yi D, Ahn H, Jung G, Jung JH, Chang YY, Kim K, Choi H, Choi J, Lee JY, Kang KM, Sohn CH, et al, and Korean Brain Aging Study for Early Diagnosis and Prediction of Alzheimer Disease (KBASE) Research Group. Plasma Leptin and Alzheimer Protein Pathologies Among Older Adults. *JAMA Netw Open*. 2024; 7:e249539.  
<https://doi.org/10.1001/jamanetworkopen.2024.9539>  
PMID:38700863
26. Larrayoz IM, Ferrero H, Martisova E, Gil-Bea FJ, Ramírez MJ, Martínez A. Adrenomedullin Contributes to Age-Related Memory Loss in Mice and Is Elevated in Aging Human Brains. *Front Mol Neurosci*. 2017; 10:384.  
<https://doi.org/10.3389/fnmol.2017.00384>  
PMID:29187812
27. González HM, Tarraf W, Stickel AM, Morlett A, González KA, Ramos AR, Rundek T, Gallo LC, Talavera GA, Daviglius ML, Lipton RB, Isasi C, Lamar M, et al. Glycemic Control, Cognitive Aging, and Impairment Among Diverse Hispanic/Latino Individuals: Study of Latinos-Investigation of Neurocognitive Aging (Hispanic Community Health Study/Study of Latinos). *Diabetes Care*. 2024; 47:1152–61.



<https://doi.org/10.2337/dc23-2003>

PMID:38684486

28. Zhou A, Wu Z, Zaw Phyto AZ, Torres D, Vishwanath S, Ryan J. Epigenetic aging as a biomarker of dementia and related outcomes: a systematic review. *Epigenomics*. 2022; 14:1125–38.  
<https://doi.org/10.2217/epi-2022-0209>  
PMID:36154448
29. Liang WS, Goetz LH, Schork NJ. Assessing brain and biological aging trajectories associated with Alzheimer's disease. *Front Neurosci*. 2022; 16:1036102.  
<https://doi.org/10.3389/fnins.2022.1036102>  
PMID:36389222
30. Starnawska A, Tan Q, Lenart A, McGue M, Mors O, Børsglum AD, Christensen K, Nyegaard M, Christiansen L. Blood DNA methylation age is not associated with cognitive functioning in middle-aged monozygotic twins. *Neurobiol Aging*. 2017; 50:60–3.  
<https://doi.org/10.1016/j.neurobiolaging.2016.10.025>  
PMID:27889677
31. Vaccarino V, Huang M, Wang Z, Hui Q, Shah AJ, Goldberg J, Smith N, Kaseer B, Murrah N, Levantsevych OM, Shallenberger L, Driggers E, Bremner JD, Sun YV. Epigenetic Age Acceleration and Cognitive Decline: A Twin Study. *J Gerontol A Biol Sci Med Sci*. 2021; 76:1854–63.  
<https://doi.org/10.1093/gerona/glab047>  
PMID:33606025
32. Marioni RE, Shah S, McRae AF, Ritchie SJ, Muniz-Terrera G, Harris SE, Gibson J, Redmond P, Cox SR, Pattie A, Corley J, Taylor A, Murphy L, et al. The epigenetic clock is correlated with physical and cognitive fitness in the Lothian Birth Cohort 1936. *Int J Epidemiol*. 2015; 44:1388–96.  
<https://doi.org/10.1093/ije/dyu277>  
PMID:25617346
33. Marioni RE, Suderman M, Chen BH, Horvath S, Bandinelli S, Morris T, Beck S, Ferrucci L, Pedersen NL, Relton CL, Deary IJ, Hägg S. Tracking the Epigenetic Clock Across the Human Life Course: A Meta-analysis of Longitudinal Cohort Data. *J Gerontol A Biol Sci Med Sci*. 2019; 74:57–61.  
<https://doi.org/10.1093/gerona/gly060>  
PMID:29718110
34. Bressler J, Marioni RE, Walker RM, Xia R, Gottesman RF, Windham BG, Grove ML, Guan W, Pankow JS, Evans KL, McIntosh AM, Deary IJ, Mosley TH, et al. Epigenetic Age Acceleration and Cognitive Function in African American Adults in Midlife: The Atherosclerosis Risk in Communities Study. *J Gerontol A Biol Sci Med Sci*. 2020; 75:473–80.  
<https://doi.org/10.1093/gerona/glz245>  
PMID:31630168
35. Faul JD, Kim JK, Levine ME, Thyagarajan B, Weir DR, Crimmins EM. Epigenetic-based age acceleration in a representative sample of older Americans: Associations with aging-related morbidity and mortality. *Proc Natl Acad Sci U S A*. 2023; 120:e2215840120.  
<https://doi.org/10.1073/pnas.2215840120>  
PMID:36802439
36. Felt JM, Yusupov N, Harrington KD, Fietz J, Zhang ZZ, Sliwinski MJ, Ram N, O'Donnell KJ, Meaney MJ, Putnam FW, Noll JG, Binder EB, Shenk CE, and BeCOME Working Group. Epigenetic age acceleration as a biomarker for impaired cognitive abilities in adulthood following early life adversity and psychiatric disorders. *Neurobiol Stress*. 2023; 27:100577.  
<https://doi.org/10.1016/j.ynstr.2023.100577>  
PMID:37885906
37. Yannatos I, Stites SD, Boen C, Xie SX, Brown RT, McMillan CT. Epigenetic age and socioeconomic status contribute to racial disparities in cognitive and functional aging between Black and White older Americans. *medRxiv*. 2023; 2023.09.29.23296351.  
<https://doi.org/10.1101/2023.09.29.23296351>  
PMID:37873230
38. Zavala DV, Dzikowski N, Gopalan S, Harrington KD, Pasquini G, Mogle J, Reid K, Sliwinski M, Graham-Engeland JE, Engeland CG, Bernard K, Veeramah K, Scott SB. Epigenetic Age Acceleration and Chronological Age: Associations With Cognitive Performance in Daily Life. *J Gerontol A Biol Sci Med Sci*. 2024; 79:glad242.  
<https://doi.org/10.1093/gerona/glad242>  
PMID:37899644
39. Graves AJ, Danoff JS, Kim M, Brindley SR, Skyberg AM, Giamberardino SN, Lynch ME, Straka BC, Lillard TS, Gregory SG, Connelly JJ, Morris JP. Accelerated epigenetic age is associated with whole-brain functional connectivity and impaired cognitive performance in older adults. *Sci Rep*. 2024; 14:9646.  
<https://doi.org/10.1038/s41598-024-60311-3>  
PMID:38671048
40. McCrory C, Fiorito G, Hernandez B, Polidoro S, O'Halloran AM, Hever A, Ni Cheallaigh C, Lu AT, Horvath S, Vineis P, Kenny RA. GrimAge Outperforms Other Epigenetic Clocks in the Prediction of Age-Related Clinical Phenotypes and All-Cause Mortality. *J Gerontol A Biol Sci Med Sci*. 2021; 76:741–9.  
<https://doi.org/10.1093/gerona/glaa286>  
PMID:33211845
41. Beydoun MA, Shaked D, Tajuddin SM, Weiss J, Evans MK, Zonderman AB. Accelerated epigenetic age and



- cognitive decline among urban-dwelling adults. *Neurology*. 2020; 94:e613–25.  
<https://doi.org/10.1212/WNL.00000000000008756>  
PMID:31879275
42. Degerman S, Josefsson M, Nordin Adolfsson A, Wennstedt S, Landfors M, Haider Z, Pudas S, Hultdin M, Nyberg L, Adolfsson R. Maintained memory in aging is associated with young epigenetic age. *Neurobiol Aging*. 2017; 55:167–71.  
<https://doi.org/10.1016/j.neurobiolaging.2017.02.009>  
PMID:28292535
  43. Nguyen S, McEvoy LK, Espeland MA, Whitsel EA, Lu A, Horvath S, Manson JE, Rapp SR, Shadyab AH. Associations of Epigenetic Age Estimators With Cognitive Function Trajectories in the Women's Health Initiative Memory Study. *Neurology*. 2024; 103:e209534.  
<https://doi.org/10.1212/WNL.0000000000209534>  
PMID:38857479
  44. Shadyab AH, McEvoy LK, Horvath S, Whitsel EA, Rapp SR, Espeland MA, Resnick SM, Manson JE, Chen JC, Chen BH, Li W, Hayden KM, Bao W, et al. Association of Epigenetic Age Acceleration With Incident Mild Cognitive Impairment and Dementia Among Older Women. *J Gerontol A Biol Sci Med Sci*. 2022; 77:1239–44.  
<https://doi.org/10.1093/gerona/glab245>  
PMID:34417803
  45. Fransquet PD, Wrigglesworth J, Woods RL, Ernst ME, Ryan J. The epigenetic clock as a predictor of disease and mortality risk: a systematic review and meta-analysis. *Clin Epigenetics*. 2019; 11:62.  
<https://doi.org/10.1186/s13148-019-0656-7>  
PMID:30975202
  46. Sibbett RA, Altschul DM, Marioni RE, Deary IJ, Starr JM, Russ TC. DNA methylation-based measures of accelerated biological ageing and the risk of dementia in the oldest-old: a study of the Lothian Birth Cohort 1921. *BMC Psychiatry*. 2020; 20:91.  
<https://doi.org/10.1186/s12888-020-2469-9>  
PMID:32111184
  47. Harman MF, Martín MG. Epigenetic mechanisms related to cognitive decline during aging. *J Neurosci Res*. 2020; 98:234–46.  
<https://doi.org/10.1002/jnr.24436>  
PMID:31045277
  48. Liu Z, Leung D, Thrush K, Zhao W, Ratliff S, Tanaka T, Schmitz LL, Smith JA, Ferrucci L, Levine ME. Underlying features of epigenetic aging clocks in vivo and in vitro. *Aging Cell*. 2020; 19:e13229.  
<https://doi.org/10.1111/acer.13229>  
PMID:32930491
  49. McCartney DL, Min JL, Richmond RC, Lu AT, Sobczyk MK, Davies G, Broer L, Guo X, Jeong A, Jung J, Kasela S, Katrinli S, Kuo PL, et al, and Genetics of DNA Methylation Consortium, and NHLBI Trans-Omics for Precision Medicine (TOPMed) Consortium. Genome-wide association studies identify 137 genetic loci for DNA methylation biomarkers of aging. *Genome Biol*. 2021; 22:194.  
<https://doi.org/10.1186/s13059-021-02398-9>  
PMID:34187551
  50. Levine ME, Higgins-Chen A, Thrush K, Minter C, Niimi P. Clock Work: Deconstructing the Epigenetic Clock Signals in Aging, Disease, and Reprogramming. *bioRxiv*. 2022; 2022.02.13.480245.  
<https://doi.org/10.1101/2022.02.13.480245>
  51. McCartney DL, Zhang F, Hillary RF, Zhang Q, Stevenson AJ, Walker RM, Birmingham ML, Boutin T, Morris SW, Campbell A, Murray AD, Whalley HC, Porteous DJ, et al. An epigenome-wide association study of sex-specific chronological ageing. *Genome Med*. 2019; 12:1.  
<https://doi.org/10.1186/s13073-019-0693-z>  
PMID:31892350
  52. Yusipov I, Bacalini MG, Kalyakulina A, Krivonosov M, Pirazzini C, Gensous N, Ravaioli F, Milazzo M, Giuliani C, Vedunova M, Fiorito G, Gagliardi A, Polidoro S, et al. Age-related DNA methylation changes are sex-specific: a comprehensive assessment. *Aging (Albany NY)*. 2020; 12:24057–80.  
<https://doi.org/10.18632/aging.202251>  
PMID:33276343
  53. Teschendorff AE. A comparison of epigenetic mitotic-like clocks for cancer risk prediction. *Genome Med*. 2020; 12:56.  
<https://doi.org/10.1186/s13073-020-00752-3>  
PMID:32580750
  54. Yang Z, Wong A, Kuh D, Paul DS, Rakyan VK, Leslie RD, Zheng SC, Widschwendter M, Beck S, Teschendorff AE. Correlation of an epigenetic mitotic clock with cancer risk. *Genome Biol*. 2016; 17:205.  
<https://doi.org/10.1186/s13059-016-1064-3>  
PMID:27716309
  55. Lavange LM, Kalsbeek WD, Sorlie PD, Avilés-Santa LM, Kaplan RC, Barnhart J, Liu K, Giachello A, Lee DJ, Ryan J, Criqui MH, Elder JP. Sample design and cohort selection in the Hispanic Community Health Study/Study of Latinos. *Ann Epidemiol*. 2010; 20:642–9.  
<https://doi.org/10.1016/j.annepidem.2010.05.006>  
PMID:20609344
  56. Sorlie PD, Avilés-Santa LM, Wassertheil-Smoller S, Kaplan RC, Daviglus ML, Giachello AL, Schneiderman N, Raji L, Talavera G, Allison M, Lavange L, Chambless

- LE, Heiss G. Design and implementation of the Hispanic Community Health Study/Study of Latinos. *Ann Epidemiol*. 2010; 20:629–41.  
<https://doi.org/10.1016/j.annepidem.2010.03.015>  
PMID:20609343
57. González HM, Tarraf W, Fornage M, González KA, Chai A, Youngblood M, Abreu MLA, Zeng D, Thomas S, Talavera GA, Gallo LC, Kaplan R, Daviglus ML, Schneiderman N. A research framework for cognitive aging and Alzheimer's disease among diverse US Latinos: Design and implementation of the Hispanic Community Health Study/Study of Latinos-Investigation of Neurocognitive Aging (SOL-INCA). *Alzheimers Dement*. 2019; 15:1624–32.  
<https://doi.org/10.1016/j.jalz.2019.08.192>  
PMID:31759880
  58. González HM, Mungas D, Reed BR, Marshall S, Haan MN. A new verbal learning and memory test for English-and Spanish-speaking older people. *J Int Neuropsychol Soc*. 2001; 7:544–55.  
<https://doi.org/10.1017/s1355617701755026>  
PMID:11459106
  59. Lezak MD, Howieson DB, Loring DW, Hannay HJ, Fischer JS. *Neuropsychological assessment* (4th edition). Oxford University Press: New York. 2004.
  60. Wechsler D. *WAIS-R: Wechsler Adult Intelligence Scale-Revised*. Psychological Corporation: New York. 1981.
  61. Callahan CM, Unverzagt FW, Hui SL, Perkins AJ, Hendrie HC. Six-item screener to identify cognitive impairment among potential subjects for clinical research. *Med Care*. 2002; 40:771–81.  
<https://doi.org/10.1097/00005650-200209000-00007>  
PMID:12218768
  62. Duff K. Evidence-based indicators of neuropsychological change in the individual patient: relevant concepts and methods. *Arch Clin Neuropsychol*. 2012; 27:248–61.  
<https://doi.org/10.1093/arclin/acr120>  
PMID:22382384
  63. Albert MS, DeKosky ST, Dickson D, Dubois B, Feldman HH, Fox NC, Gamst A, Holtzman DM, Jagust WJ, Petersen RC, Snyder PJ, Carrillo MC, Thies B, Phelps CH. The diagnosis of mild cognitive impairment due to Alzheimer's disease: recommendations from the National Institute on Aging-Alzheimer's Association workgroups on diagnostic guidelines for Alzheimer's disease. *Alzheimers Dement*. 2011; 7:270–9.  
<https://doi.org/10.1016/j.jalz.2011.03.008>  
PMID:21514249
  64. Zhou W, Triche TJ Jr, Laird PW, Shen H. SeSAmE: reducing artifactual detection of DNA methylation by Infinium BeadChips in genomic deletions. *Nucleic Acids Res*. 2018; 46:e123.  
<https://doi.org/10.1093/nar/gky691>  
PMID:30085201
  65. Pidsley R, Y Wong CC, Volta M, Lunnon K, Mill J, Schalkwyk LC. A data-driven approach to preprocessing Illumina 450K methylation array data. *BMC Genomics*. 2013; 14:293.  
<https://doi.org/10.1186/1471-2164-14-293>  
PMID:23631413
  66. Higgins-Chen AT, Thrush KL, Wang Y, Minter CJ, Kuo PL, Wang M, Niimi P, Sturm G, Lin J, Moore AZ, Bandinelli S, Vinkers CH, Vermetten E, et al. A computational solution for bolstering reliability of epigenetic clocks: Implications for clinical trials and longitudinal tracking. *Nat Aging*. 2022; 2:644–61.  
<https://doi.org/10.1038/s43587-022-00248-2>  
PMID:36277076
  67. Lloyd-Jones DM, Hong Y, Labarthe D, Mozaffarian D, Appel LJ, Van Horn L, Greenland K, Daniels S, Nichol G, Tomaselli GF, Arnett DK, Fonarow GC, Ho PM, et al, and American Heart Association Strategic Planning Task Force and Statistics Committee. Defining and setting national goals for cardiovascular health promotion and disease reduction: the American Heart Association's strategic Impact Goal through 2020 and beyond. *Circulation*. 2010; 121:586–613.  
<https://doi.org/10.1161/CIRCULATIONAHA.109.192703>  
PMID:20089546

## SUPPLEMENTARY MATERIALS

### Supplementary Tables

**Supplementary Table 1. Correlations between chronological age and DNA methylation age estimated from 5 epigenetic clocks at each visit.**

|         | Hannum | Horvath | PhenoAge | GrimAge | DunedinPACE* |
|---------|--------|---------|----------|---------|--------------|
| Visit 1 | 0.80   | 0.78    | 0.78     | 0.86    | 0.80 (0.05)  |
| Visit 2 | 0.78   | 0.76    | 0.76     | 0.86    | 0.78 (0.13)  |

P-value < 0.0001 for all correlations; \* rescaled values (original scale shown in parentheses).

**Supplementary Table 2. Correlation between epigenetic age acceleration within visit and across visits.**

|             | Hannum | Horvath | PhenoAge | GrimAge | DunedinPACE |
|-------------|--------|---------|----------|---------|-------------|
| Hannum      | 0.89   | 0.88    | 0.68     | 0.34    | 0.21        |
| Horvath     | 0.88   | 0.93    | 0.60     | 0.33    | 0.18        |
| PhenoAge    | 0.70   | 0.64    | 0.81     | 0.50    | 0.45        |
| GrimAge     | 0.41   | 0.38    | 0.57     | 0.91    | 0.53        |
| DunedinPACE | 0.27   | 0.21    | 0.48     | 0.53    | 0.81        |

P-value < 0.0001 for all correlations; Pairwise correlations between clocks at visit 2 are shown in white. Pairwise correlations between clocks across visits are shown in black. Pairwise correlations between clocks at visit 1 are shown in grey.

**Supplementary Table 3. Cross-sectional associations of epigenetic clocks with individual cognitive test scores at each visit.**

#### 3A. B-SEVLT sum

|             |              | Model 1 |       |                              |                              | Model 2 |       |                              |                              | Model 3 |       |                              |                              |
|-------------|--------------|---------|-------|------------------------------|------------------------------|---------|-------|------------------------------|------------------------------|---------|-------|------------------------------|------------------------------|
| EAA Measure |              | beta    | SE    | P-value                      | Adj_ P-value                 | beta    | SE    | P-value                      | Adj_ P-value                 | beta    | SE    | P-value                      | Adj_ P-value                 |
| Visit 1     | Hannum       | -0.005  | 0.004 | 0.259                        | 1.00                         | -0.003  | 0.004 | 0.429                        | 1.00                         | -0.003  | 0.004 | 0.427                        | 1.00                         |
|             | Horvath      | -0.007  | 0.004 | 0.089                        | 0.445                        | -0.005  | 0.004 | 0.155                        | 0.775                        | -0.005  | 0.004 | 0.180                        | 0.900                        |
|             | PhenoAge     | -0.007  | 0.003 | <b>0.028</b>                 | 0.140                        | -0.005  | 0.003 | 0.132                        | 0.660                        | -0.004  | 0.003 | 0.160                        | 0.800                        |
|             | GrimAge      | -0.016  | 0.005 | <b>0.002</b>                 | <b>0.010</b>                 | -0.011  | 0.005 | <b>0.028</b>                 | 0.140                        | -0.009  | 0.005 | 0.068                        | 0.340                        |
|             | DunedinPACE* | -0.010  | 0.002 | <b>5.4 × 10<sup>-5</sup></b> | <b>2.7 × 10<sup>-4</sup></b> | -0.007  | 0.002 | <b>0.002</b>                 | <b>0.010</b>                 | -0.006  | 0.002 | <b>0.009</b>                 | <b>0.045</b>                 |
| Visit 2     | Hannum       | -0.012  | 0.005 | <b>0.008</b>                 | <b>0.040</b>                 | -0.010  | 0.004 | <b>0.019</b>                 | 0.095                        | -0.009  | 0.004 | <b>0.036</b>                 | 0.180                        |
|             | Horvath      | -0.012  | 0.005 | <b>0.011</b>                 | 0.055                        | -0.010  | 0.004 | <b>0.021</b>                 | 0.105                        | -0.009  | 0.004 | <b>0.035</b>                 | 0.175                        |
|             | PhenoAge     | -0.016  | 0.003 | <b>6.3 × 10<sup>-6</sup></b> | <b>3.2 × 10<sup>-5</sup></b> | -0.015  | 0.003 | <b>2.5 × 10<sup>-5</sup></b> | <b>1.2 × 10<sup>-4</sup></b> | -0.013  | 0.003 | <b>0.0001</b>                | <b>0.0005</b>                |
|             | GrimAge      | -0.034  | 0.006 | <b>3.0 × 10<sup>-8</sup></b> | <b>1.5 × 10<sup>-7</sup></b> | -0.030  | 0.006 | <b>8.8 × 10<sup>-7</sup></b> | <b>4.4 × 10<sup>-6</sup></b> | -0.026  | 0.006 | <b>2.5 × 10<sup>-5</sup></b> | <b>1.2 × 10<sup>-4</sup></b> |
|             | DunedinPACE* | -0.014  | 0.003 | <b>6.8 × 10<sup>-8</sup></b> | <b>3.4 × 10<sup>-8</sup></b> | -0.011  | 0.003 | <b>7.4 × 10<sup>-6</sup></b> | <b>3.7 × 10<sup>-5</sup></b> | -0.009  | 0.003 | <b>0.0003</b>                | <b>0.0015</b>                |

#### 3B. B-SEVLT recall

|             |          | Model 1 |       |              |              | Model 2 |       |         |              | Model 3 |       |         |              |
|-------------|----------|---------|-------|--------------|--------------|---------|-------|---------|--------------|---------|-------|---------|--------------|
| EAA Measure |          | beta    | SE    | P-value      | Adj_ P-value | beta    | SE    | P-value | Adj_ P-value | beta    | SE    | P-value | Adj_ P-value |
| Visit 1     | Hannum   | -0.006  | 0.004 | 0.131        | 0.655        | -0.005  | 0.004 | 0.2121  | 1.00         | -0.005  | 0.004 | 0.252   | 1.00         |
|             | Horvath  | -0.006  | 0.004 | 0.113        | 0.565        | -0.005  | 0.004 | 0.1763  | 0.881        | -0.005  | 0.004 | 0.249   | 1.00         |
|             | PhenoAge | -0.007  | 0.003 | <b>0.026</b> | 0.130        | -0.005  | 0.003 | 0.093   | 0.465        | -0.004  | 0.003 | 0.174   | 0.870        |

|         |              |        |       |               |              |        |       |              |              |        |       |              |              |
|---------|--------------|--------|-------|---------------|--------------|--------|-------|--------------|--------------|--------|-------|--------------|--------------|
|         | GrimAge      | −0.011 | 0.005 | <b>0.023</b>  | 0.115        | −0.008 | 0.005 | 0.125        | 0.625        | −0.004 | 0.005 | 0.380        | 1.00         |
|         | DunedinPACE* | −0.008 | 0.002 | <b>0.0004</b> | <b>0.002</b> | −0.006 | 0.002 | <b>0.006</b> | <b>0.03</b>  | −0.005 | 0.002 | <b>0.044</b> | 0.220        |
|         | Hannum       | −0.006 | 0.005 | 0.231         | 1.00         | −0.004 | 0.005 | 0.348        | 1.00         | −0.004 | 0.005 | 0.433        | 1.00         |
|         | Horvath      | −0.004 | 0.005 | 0.374         | 1.00         | −0.003 | 0.005 | 0.505        | 1.00         | −0.003 | 0.005 | 0.563        | 1.00         |
| Visit 2 | PhenoAge     | −0.012 | 0.004 | <b>0.0008</b> | <b>0.004</b> | −0.011 | 0.003 | <b>0.002</b> | <b>0.010</b> | −0.010 | 0.004 | <b>0.005</b> | <b>0.025</b> |
|         | GrimAge      | −0.020 | 0.006 | <b>0.0008</b> | <b>0.004</b> | −0.017 | 0.006 | <b>0.004</b> | <b>0.020</b> | −0.015 | 0.006 | <b>0.016</b> | 0.080        |
|         | DunedinPACE* | −0.008 | 0.003 | <b>0.003</b>  | <b>0.015</b> | −0.006 | 0.003 | <b>0.029</b> | 0.145        | −0.004 | 0.003 | 0.106        | 0.530        |

### 3C. WF

| Model 1          |        |       |                                        |                                        | Model 2 |       |                                        |                                        | Model 3 |       |                                        |                                        |
|------------------|--------|-------|----------------------------------------|----------------------------------------|---------|-------|----------------------------------------|----------------------------------------|---------|-------|----------------------------------------|----------------------------------------|
| EAA Measure      | beta   | SE    | P-value                                | Adj_<br>P-value                        | beta    | SE    | P-value                                | Adj_<br>P-value                        | beta    | SE    | P-value                                | Adj_<br>P-value                        |
| Hannum           | −0.009 | 0.004 | <b>0.029</b>                           | 0.145                                  | −0.007  | 0.004 | 0.075                                  | 0.375                                  | −0.006  | 0.004 | 0.106                                  | 0.530                                  |
| Horvath          | −0.011 | 0.004 | <b>0.012</b>                           | 0.060                                  | −0.008  | 0.004 | <b>0.027</b>                           | 0.135                                  | −0.008  | 0.004 | <b>0.043</b>                           | 0.215                                  |
| Visit 1 PhenoAge | −0.014 | 0.003 | <b><math>3.3 \times 10^{-5}</math></b> | <b><math>1.7 \times 10^{-4}</math></b> | −0.010  | 0.003 | <b>0.001</b>                           | <b>0.005</b>                           | −0.009  | 0.003 | <b>0.003</b>                           | <b>0.015</b>                           |
| GrimAge          | −0.024 | 0.005 | <b><math>5.8 \times 10^{-6}</math></b> | <b><math>2.9 \times 10^{-5}</math></b> | −0.017  | 0.005 | <b>0.0005</b>                          | <b>0.0025</b>                          | −0.016  | 0.005 | <b>0.002</b>                           | <b>0.010</b>                           |
| DunedinPACE*     | −0.015 | 0.002 | <b><math>1.2 \times 10^{-9}</math></b> | <b><math>6.0 \times 10^{-9}</math></b> | −0.011  | 0.002 | <b><math>8.7 \times 10^{-7}</math></b> | <b><math>4.4 \times 10^{-4}</math></b> | −0.011  | 0.002 | <b><math>1.3 \times 10^{-5}</math></b> | <b><math>6.5 \times 10^{-5}</math></b> |
| Hannum           | −0.015 | 0.005 | <b>0.002</b>                           | <b>0.010</b>                           | −0.012  | 0.004 | <b>0.007</b>                           | <b>0.035</b>                           | −0.011  | 0.004 | <b>0.014</b>                           | 0.070                                  |
| Horvath          | −0.015 | 0.005 | <b>0.001</b>                           | <b>0.005</b>                           | −0.013  | 0.004 | <b>0.003</b>                           | <b>0.015</b>                           | −0.012  | 0.004 | <b>0.005</b>                           | <b>0.025</b>                           |
| Visit 2 PhenoAge | −0.016 | 0.004 | <b><math>1.1 \times 10^{-5}</math></b> | <b><math>5.5 \times 10^{-5}</math></b> | −0.014  | 0.003 | <b><math>8.5 \times 10^{-5}</math></b> | <b><math>4.3 \times 10^{-4}</math></b> | −0.012  | 0.003 | <b>0.0003</b>                          | <b>0.0015</b>                          |
| GrimAge          | −0.033 | 0.006 | <b><math>1.4 \times 10^{-7}</math></b> | <b><math>7.0 \times 10^{-7}</math></b> | −0.025  | 0.006 | <b><math>6.3 \times 10^{-6}</math></b> | <b><math>3.2 \times 10^{-5}</math></b> | −0.023  | 0.006 | <b>0.0001</b>                          | <b>0.0005</b>                          |
| DunedinPACE*     | −0.016 | 0.003 | <b><math>4.3 \times 10^{-9}</math></b> | <b><math>2.2 \times 10^{-8}</math></b> | −0.011  | 0.002 | <b><math>3.2 \times 10^{-6}</math></b> | <b><math>1.6 \times 10^{-5}</math></b> | −0.010  | 0.003 | <b>0.0001</b>                          | <b>0.0005</b>                          |

### 3D. DSST

| Model 1          |        |       |                                        |                                        | Model 2 |       |                                        |                                        | Model 3 |       |                                        |                                        |
|------------------|--------|-------|----------------------------------------|----------------------------------------|---------|-------|----------------------------------------|----------------------------------------|---------|-------|----------------------------------------|----------------------------------------|
| EAA Measure      | beta   | SE    | P-value                                | Adj_<br>P-value                        | beta    | SE    | P-value                                | Adj_<br>P-value                        | beta    | SE    | P-value                                | Adj_<br>P-value                        |
| Hannum           | −0.009 | 0.004 | <b>0.016</b>                           | 0.080                                  | −0.007  | 0.003 | <b>0.032</b>                           | 0.160                                  | −0.007  | 0.003 | <b>0.031</b>                           | 0.155                                  |
| Horvath          | −0.011 | 0.004 | <b>0.005</b>                           | <b>0.025</b>                           | −0.008  | 0.003 | <b>0.010</b>                           | 0.050                                  | −0.009  | 0.003 | <b>0.008</b>                           | <b>0.040</b>                           |
| Visit 1 PhenoAge | −0.010 | 0.003 | <b>0.001</b>                           | <b>0.005</b>                           | −0.006  | 0.003 | <b>0.016</b>                           | 0.080                                  | −0.006  | 0.003 | <b>0.019</b>                           | 0.095                                  |
| GrimAge          | −0.012 | 0.005 | <b>0.013</b>                           | 0.065                                  | −0.008  | 0.004 | <b>0.060</b>                           | 0.300                                  | −0.008  | 0.004 | <b>0.053</b>                           | 0.265                                  |
| DunedinPACE*     | −0.010 | 0.002 | <b><math>2.8 \times 10^{-5}</math></b> | <b><math>1.4 \times 10^{-4}</math></b> | −0.006  | 0.002 | <b>0.003</b>                           | <b>0.015</b>                           | −0.006  | 0.002 | <b>0.002</b>                           | <b>0.010</b>                           |
| Hannum           | −0.012 | 0.004 | <b>0.003</b>                           | <b>0.015</b>                           | −0.010  | 0.004 | <b>0.006</b>                           | <b>0.030</b>                           | −0.009  | 0.004 | <b>0.011</b>                           | 0.055                                  |
| Horvath          | −0.013 | 0.004 | <b>0.003</b>                           | <b>0.015</b>                           | −0.010  | 0.004 | <b>0.005</b>                           | <b>0.025</b>                           | −0.009  | 0.004 | <b>0.008</b>                           | <b>0.040</b>                           |
| Visit 2 PhenoAge | −0.012 | 0.003 | <b>0.0001</b>                          | <b>0.0005</b>                          | −0.011  | 0.003 | <b><math>1.1 \times 10^{-4}</math></b> | <b><math>5.5 \times 10^{-4}</math></b> | −0.010  | 0.003 | <b>0.0004</b>                          | <b>0.002</b>                           |
| GrimAge          | −0.027 | 0.005 | <b><math>5.9 \times 10^{-7}</math></b> | <b><math>3.0 \times 10^{-6}</math></b> | −0.023  | 0.005 | <b><math>3.8 \times 10^{-7}</math></b> | <b><math>1.9 \times 10^{-6}</math></b> | −0.022  | 0.005 | <b><math>2.4 \times 10^{-6}</math></b> | <b><math>1.2 \times 10^{-5}</math></b> |
| DunedinPACE*     | −0.012 | 0.002 | <b><math>1.4 \times 10^{-7}</math></b> | <b><math>7.0 \times 10^{-6}</math></b> | −0.009  | 0.002 | <b><math>2.0 \times 10^{-5}</math></b> | <b><math>1.0 \times 10^{-4}</math></b> | −0.007  | 0.002 | <b>0.0002</b>                          | <b>0.001</b>                           |

Model 1: Adjusted for age, gender, center, and Hispanic background; Model 2: Adjusted for variables in Model 1 + years of education, language preference; Model 3: Adjusted for variables in Model 2 + cardiovascular health score (Life's Simple 7 category); \*DunedinPACE was rescaled to allow for comparison with other clocks (P-value shown for association on the original scale)

**Supplementary Table 4. Association of change in global cognitive function with epigenetic age acceleration (EAA) at visit 1 for 5 clocks.**

| EAA Measure     | Model 1 |       |                              |                              | Model 2 |       |                              |                              | Model 3 |       |               |               |
|-----------------|---------|-------|------------------------------|------------------------------|---------|-------|------------------------------|------------------------------|---------|-------|---------------|---------------|
|                 | beta    | SE    | P-value                      | Adj_P-value                  | beta    | SE    | P-value                      | Adj_P-value                  | beta    | SE    | P-value       | Adj_P-value   |
| V1 Hannum       | −0.014  | 0.006 | <b>0.0177</b>                | 0.088                        | −0.013  | 0.006 | <b>0.026</b>                 | 0.130                        | −0.012  | 0.006 | <b>0.032</b>  | 0.160         |
| V1 Horvath      | −0.010  | 0.006 | 0.076                        | 0.380                        | −0.009  | 0.006 | 0.106                        | 0.530                        | −0.009  | 0.006 | 0.112         | 0.560         |
| V1 PhenoAge     | −0.015  | 0.005 | <b>0.0016</b>                | <b>0.008</b>                 | −0.013  | 0.005 | <b>0.0040</b>                | <b>0.020</b>                 | −0.012  | 0.005 | <b>0.008</b>  | <b>0.040</b>  |
| V1 GrimAge      | −0.027  | 0.007 | <b>0.0002</b>                | <b>0.001</b>                 | −0.026  | 0.007 | <b>0.0005</b>                | <b>0.0025</b>                | −0.024  | 0.008 | <b>0.002</b>  | <b>0.010</b>  |
| V1 DunedinPACE* | −0.009  | 0.003 | <b>0.0028</b>                | <b>0.014</b>                 | −0.008  | 0.003 | <b>0.0082</b>                | <b>0.041</b>                 | −0.007  | 0.003 | <b>0.035</b>  | 0.175         |
| V2 Hannum       | −0.010  | 0.005 | 0.0653                       | 0.362                        | −0.009  | 0.005 | 0.0853                       | 0.426                        | −0.009  | 0.005 | 0.115         | 0.575         |
| V2 Horvath      | −0.010  | 0.005 | 0.0639                       | 0.319                        | −0.009  | 0.005 | 0.0861                       | 0.430                        | −0.009  | 0.005 | 0.096         | 0.480         |
| V2 PhenoAge     | −0.016  | 0.004 | <b>9.7 × 10<sup>−5</sup></b> | <b>4.8 × 10<sup>−4</sup></b> | −0.016  | 0.004 | <b>0.0002</b>                | <b>0.001</b>                 | −0.015  | 0.004 | <b>0.0005</b> | <b>0.0025</b> |
| V2 GrimAge      | −0.032  | 0.007 | <b>9.2 × 10<sup>−6</sup></b> | <b>4.6 × 10<sup>−5</sup></b> | −0.031  | 0.007 | <b>1.7 × 10<sup>−5</sup></b> | <b>8.5 × 10<sup>−5</sup></b> | −0.029  | 0.007 | <b>0.0001</b> | <b>0.0005</b> |
| V2 DunedinPACE* | −0.009  | 0.003 | <b>0.0006</b>                | <b>0.003</b>                 | −0.009  | 0.003 | <b>0.0021</b>                | <b>0.010</b>                 | −0.007  | 0.003 | <b>0.0112</b> | 0.056         |

Model 1: Adjusted for age, gender, center, and Hispanic background; Model 2: Adjusted for variables in Model 1 + years of education, language preference; Model 3: Adjusted for variables in Model 2 + cardiovascular health (Life's Simple 7 category); \*DunedinPACE was rescaled to allow for comparison with other clocks (P-value shown for association on the original scale).

**Supplementary Table 5. Association of change in individual cognitive tests scores with change (Δ) in epigenetic age acceleration (EAA) between visit 1 and visit 2 for 5 clocks.**

#### 5A. B-SEVLT sum change

| EAA Measure    | Model 1 |       |              |             | Model 2 |       |              |             | Model 3 |       |         |             |
|----------------|---------|-------|--------------|-------------|---------|-------|--------------|-------------|---------|-------|---------|-------------|
|                | Beta    | SE    | P-value      | Adj_P-value | Beta    | SE    | P-value      | Adj_P-value | Beta    | SE    | P-value | Adj_P-value |
| Δ Hannum       | −0.028  | 0.061 | 0.642        | 1.00        | −0.025  | 0.060 | 0.681        | 1.00        | −0.015  | 0.061 | 0.811   | 1.00        |
| Δ Horvath      | −0.090  | 0.076 | 0.240        | 1.00        | −0.090  | 0.076 | 0.237        | 1.00        | −0.079  | 0.076 | 0.301   | 1.00        |
| Δ PhenoAge     | −0.075  | 0.038 | <b>0.048</b> | 0.24        | −0.078  | 0.038 | <b>0.039</b> | 0.19        | −0.069  | 0.038 | 0.070   | 0.35        |
| Δ GrimAge      | −0.078  | 0.087 | 0.371        | 1.00        | −0.089  | 0.087 | 0.309        | 1.00        | −0.073  | 0.088 | 0.407   | 1.00        |
| Δ DunedinPACE* | −0.021  | 0.028 | 0.461        | 1.00        | −0.018  | 0.028 | 0.519        | 1.00        | −0.011  | 0.028 | 0.685   | 1.00        |

#### 5B. B-SEVLT recall change

| EAA Measure    | Model 1 |       |         |             | Model 2 |       |         |             | Model 3 |       |         |             |
|----------------|---------|-------|---------|-------------|---------|-------|---------|-------------|---------|-------|---------|-------------|
|                | Beta    | SE    | P-value | Adj_P-value | Beta    | SE    | P-value | Adj_P-value | Beta    | SE    | P-value | Adj_P-value |
| Δ Hannum       | 0.055   | 0.061 | 0.370   | 1.00        | 0.057   | 0.061 | 0.348   | 1.00        | 0.059   | 0.061 | 0.339   | 1.00        |
| Δ Horvath      | 0.002   | 0.077 | 0.979   | 1.00        | 0.001   | 0.077 | 0.987   | 1.00        | −0.002  | 0.077 | 0.980   | 1.00        |
| Δ PhenoAge     | −0.047  | 0.038 | 0.219   | 1.00        | −0.050  | 0.038 | 0.186   | 0.93        | −0.049  | 0.038 | 0.202   | 1.00        |
| Δ GrimAge      | −0.089  | 0.089 | 0.314   | 1.00        | −0.100  | 0.088 | 0.258   | 1.00        | −0.093  | 0.089 | 0.293   | 1.00        |
| Δ DunedinPACE* | −0.010  | 0.028 | 0.722   | 1.00        | −0.008  | 0.028 | 0.783   | 1.00        | −0.005  | 0.029 | 0.857   | 1.00        |

#### 5C. WF change

| EAA Measure | Model 1 |       |         |             | Model 2 |       |         |             | Model 3 |       |         |             |
|-------------|---------|-------|---------|-------------|---------|-------|---------|-------------|---------|-------|---------|-------------|
|             | Beta    | SE    | P-value | Adj_P-value | Beta    | SE    | P-value | Adj_P-value | Beta    | SE    | P-value | Adj_P-value |
| Δ Hannum    | 0.030   | 0.061 | 0.628   | 1.00        | 0.028   | 0.061 | 0.647   | 1.00        | 0.039   | 0.061 | 0.5198  | 1.00        |
| Δ Horvath   | 0.005   | 0.077 | 0.950   | 1.00        | −0.002  | 0.076 | 0.980   | 1.00        | 0.007   | 0.077 | 0.9315  | 1.00        |



|                |        |       |              |       |        |       |              |             |        |       |              |       |
|----------------|--------|-------|--------------|-------|--------|-------|--------------|-------------|--------|-------|--------------|-------|
| Δ PhenoAge     | −0.037 | 0.038 | 0.331        | 1.00  | −0.044 | 0.038 | 0.251        | 1.00        | −0.037 | 0.038 | 0.3284       | 1.00  |
| Δ GrimAge      | −0.216 | 0.089 | <b>0.015</b> | 0.075 | −0.234 | 0.088 | <b>0.008</b> | <b>0.04</b> | −0.221 | 0.088 | <b>0.013</b> | 0.065 |
| Δ DunedinPACE* | −0.049 | 0.028 | 0.080        | 0.40  | −0.049 | 0.028 | 0.078        | 0.39        | −0.048 | 0.028 | 0.089        | 0.445 |

## 5D. DSST change

| EAA Measure    | Model 1 |       |               |              | Model 2 |       |               |              | Model 3 |       |               |               |
|----------------|---------|-------|---------------|--------------|---------|-------|---------------|--------------|---------|-------|---------------|---------------|
|                | Beta    | SE    | P-value       | Adj_ P-value | Beta    | SE    | P-value       | Adj_ P-value | Beta    | SE    | P-value       | Adj_ P-value  |
| Δ Hannum       | −0.085  | 0.062 | 0.171         | 0.855        | −0.090  | 0.062 | 0.147         | 0.735        | −0.073  | 0.063 | 0.243         | 1.00          |
| Δ Horvath      | −0.098  | 0.078 | 0.208         | 1.00         | −0.105  | 0.078 | 0.178         | 0.890        | −0.091  | 0.078 | 0.246         | 1.00          |
| Δ PhenoAge     | −0.134  | 0.039 | <b>0.0006</b> | <b>0.003</b> | −0.139  | 0.039 | <b>0.0004</b> | <b>0.002</b> | −0.125  | 0.039 | <b>0.0015</b> | <b>0.0075</b> |
| Δ GrimAge      | −0.319  | 0.090 | <b>0.0004</b> | <b>0.002</b> | −0.334  | 0.090 | <b>0.0002</b> | <b>0.001</b> | −0.313  | 0.090 | <b>0.0005</b> | <b>0.0025</b> |
| Δ DunedinPACE* | −0.058  | 0.029 | <b>0.042</b>  | 0.210        | −0.059  | 0.029 | <b>0.040</b>  | 0.200        | −0.051  | 0.029 | 0.079         | 0.395         |

Model 1: Adjusted for V1 age acceleration, age, gender, center, and Hispanic background; Model 2: Adjusted for variables in Model 1 + years of education, language preference; Model 3: Adjusted for variables in Model 2 + cardiovascular health (Life's Simple 7 category); \*DunedinPACE was rescaled to allow for comparison with other clocks.

## Supplementary Table 6. Comparison of the magnitude of associations between change in DSST and epigenetic aging with the magnitude of association between change in DSST and APOE4.

|                      | beta   | SE    | P-value           |
|----------------------|--------|-------|-------------------|
| APOE4 alleles dosage | −0.084 | 0.042 | <b>0.043</b>      |
| V1 PhenoAge          | −0.010 | 0.004 | <b>0.019</b>      |
| V1 GrimAge           | −0.028 | 0.007 | <b>&lt;0.0001</b> |
| V1 DunedinPACE*      | −0.010 | 0.003 | <b>0.002</b>      |
| Δ PhenoAge           | −0.134 | 0.039 | <b>0.0006</b>     |
| Δ GrimAge            | −0.319 | 0.090 | <b>0.0004</b>     |
| Δ DunedinPACE*       | −0.058 | 0.029 | <b>0.042</b>      |

\*Model adjusted for age, gender, center, and Hispanic background.

## Supplementary Table 7. Association of cognitive aging measures with estimates of GrimAge acceleration derived from multiple algorithms.

| Cognitive aging measure             | EAA Measure    | Beta/Odds Ratio | SE/95% CI  | P-value                                 |
|-------------------------------------|----------------|-----------------|------------|-----------------------------------------|
| V1 Global Cognitive Function        | V1 PC GrimAge* | −0.018          | 0.004      | <b><math>9.1 \times 10^{-6}</math></b>  |
|                                     | V1 GrimAge     | −0.012          | 0.003      | <b><math>8.2 \times 10^{-5}</math></b>  |
|                                     | V1 GrimAge2    | −0.012          | 0.003      | <b><math>9.9 \times 10^{-5}</math></b>  |
|                                     | V2 PC GrimAge* | −0.032          | 0.005      | <b><math>3.3 \times 10^{-10}</math></b> |
| V2 Global Cognitive Function        | V2 GrimAge     | −0.020          | 0.004      | <b><math>8.4 \times 10^{-8}</math></b>  |
|                                     | V2 GrimAge2    | −0.022          | 0.003      | <b><math>8.5 \times 10^{-11}</math></b> |
|                                     | V1 PC GrimAge* | 1.07            | 1.04; 1.11 | <b><math>5.4 \times 10^{-5}</math></b>  |
|                                     | V1 GrimAge     | 1.05            | 1.02; 1.07 | <b><math>6.6 \times 10^{-4}</math></b>  |
| MCI at V2                           | V1 GrimAge2    | 1.05            | 1.03; 1.08 | <b><math>2.5 \times 10^{-5}</math></b>  |
|                                     | V2 PC GrimAge* | 1.09            | 1.05; 1.12 | <b><math>1.4 \times 10^{-6}</math></b>  |
|                                     | V2 GrimAge     | 1.06            | 1.04; 1.09 | <b><math>1.3 \times 10^{-6}</math></b>  |
|                                     | V2 GrimAge2    | 1.06            | 1.04; 1.09 | <b><math>2.3 \times 10^{-7}</math></b>  |
| Significant cognitive decline at V2 | V1 PC GrimAge* | 1.05            | 1.02; 1.08 | <b><math>1.6 \times 10^{-3}</math></b>  |
|                                     | V1 GrimAge     | 1.02            | 1.00; 1.05 | <b><math>2.9 \times 10^{-2}</math></b>  |
|                                     | V1 GrimAge2    | 1.03            | 1.01; 1.05 | <b><math>4.5 \times 10^{-3}</math></b>  |
|                                     | V2 PC GrimAge* | 1.07            | 1.04; 1.10 | <b><math>7.1 \times 10^{-6}</math></b>  |
|                                     | V2 GrimAge     | 1.05            | 1.03; 1.07 | <b><math>2.0 \times 10^{-5}</math></b>  |
|                                     | V2 GrimAge2    | 1.05            | 1.03; 1.07 | <b><math>8.4 \times 10^{-7}</math></b>  |

\*Data shown in manuscript's Tables. Models are adjusted for age, gender, center, and Hispanic background.

**Supplementary Table 8. Association of DNA methylation components of GrimAge version 2 estimated at each visit with cognitive aging measures.**

| Visit 1    | V1 Global Cognitive Function |               |              | MCI at V2     |                              |                              | Significant cognitive decline at V2 |                              |                              | Global Cognitive Function Change between V1 and V2 |                              |                              |
|------------|------------------------------|---------------|--------------|---------------|------------------------------|------------------------------|-------------------------------------|------------------------------|------------------------------|----------------------------------------------------|------------------------------|------------------------------|
|            | Beta (SE)                    | P             | Adj_P        | Beta (SE)     | P                            | Adj_P                        | Beta (SE)                           | P                            | Adj_P                        | Beta (SE)                                          | P                            | Adj_P                        |
| ADM        | −0.005 (0.013)               | 0.69          | 1.00         | 0.165 (0.060) | <b>0.006</b>                 | 0.06                         | 0.118 (0.048)                       | <b>0.0138</b>                | 0.14                         | −0.058 (0.024)                                     | <b>0.0147</b>                | 0.15                         |
| B2M        | −0.011 (0.011)               | 0.33          | 1.00         | 0.106 (0.047) | <b>0.025</b>                 | 0.25                         | 0.047 (0.040)                       | 0.24                         | 1.00                         | −0.036 (0.020)                                     | <b>0.0694</b>                | 0.69                         |
| Cystatin C | −0.027 (0.011)               | <b>0.015</b>  | 0.15         | 0.115 (0.048) | <b>0.017</b>                 | 0.17                         | 0.087 (0.040)                       | <b>0.0303</b>                | 0.30                         | −0.053 (0.020)                                     | <b>0.0081</b>                | 0.08                         |
| GDF15      | −0.015 (0.011)               | 0.16          | 1.00         | 0.165 (0.045) | <b>0.0003</b>                | <b>0.003</b>                 | 0.183 (0.042)                       | <b>1.4 × 10<sup>−5</sup></b> | <b>1.4 × 10<sup>−4</sup></b> | −0.070 (0.020)                                     | <b>0.0004</b>                | <b>0.004</b>                 |
| Leptin     | −0.003 (0.017)               | 0.87          | 1.00         | 0.038 (0.075) | 0.61                         | 1.00                         | 0.056 (0.062)                       | 0.36                         | 1.00                         | 0.012 (0.031)                                      | 0.68                         | 1.00                         |
| logA1C     | −0.034 (0.011)               | <b>0.002</b>  | <b>0.02</b>  | 0.265 (0.048) | <b>3.3 × 10<sup>−8</sup></b> | <b>3.3 × 10<sup>−7</sup></b> | 0.232 (0.041)                       | <b>1.2 × 10<sup>−8</sup></b> | <b>1.2 × 10<sup>−7</sup></b> | −0.106 (0.020)                                     | <b>8.0 × 10<sup>−8</sup></b> | <b>8.0 × 10<sup>−7</sup></b> |
| logCRP     | −0.025 (0.011)               | <b>0.030</b>  | 0.30         | 0.141 (0.051) | <b>0.005</b>                 | 0.05                         | 0.160 (0.042)                       | <b>0.0001</b>                | <b>0.001</b>                 | −0.084 (0.020)                                     | <b>3.9 × 10<sup>−5</sup></b> | <b>3.9 × 10<sup>−4</sup></b> |
| Pack Yrs   | −0.042 (0.012)               | <b>0.0003</b> | <b>0.003</b> | 0.167 (0.050) | <b>0.0007</b>                | <b>0.007</b>                 | 0.104 (0.042)                       | <b>0.0144</b>                | 0.14                         | −0.052 (0.021)                                     | <b>0.0139</b>                | 0.14                         |
| PAI1       | 0.007 (0.012)                | 0.57          | 1.00         | 0.176 (0.052) | <b>0.0007</b>                | <b>0.007</b>                 | 0.198 (0.043)                       | <b>3.8 × 10<sup>−6</sup></b> | <b>3.8 × 10<sup>−5</sup></b> | −0.074 (0.021)                                     | <b>0.0004</b>                | <b>0.004</b>                 |
| TIMP1      | −0.022 (0.011)               | 0.05          | 1.00         | 0.098 (0.050) | 0.05                         | 0.50                         | 0.087 (0.041)                       | <b>0.0351</b>                | 0.35                         | −0.048 (0.020)                                     | <b>0.0189</b>                | 0.19                         |

  

| Visit 2    | V2 Global Cognitive Function |                              |                              | MCI at V2     |                               |                              | Significant cognitive decline at V2 |                              |                              | Global Cognitive Function Change between V1 and V2 |                              |                              |
|------------|------------------------------|------------------------------|------------------------------|---------------|-------------------------------|------------------------------|-------------------------------------|------------------------------|------------------------------|----------------------------------------------------|------------------------------|------------------------------|
|            | Beta (SE)                    | P                            | Adj_P                        | Beta (SE)     | P                             | Adj_P                        | Beta (SE)                           | P                            | Adj_P                        | Beta (SE)                                          | P                            | Adj_P                        |
| ADM        | −0.037 (0.017)               | <b>0.0296</b>                | 0.30                         | 0.126 (0.061) | <b>0.0394</b>                 | 0.39                         | 0.092 (0.049)                       | 0.06                         | 0.60                         | −0.052 (0.024)                                     | <b>0.0341</b>                | 0.34                         |
| B2M        | −0.028 (0.014)               | <b>0.0414</b>                | 0.41                         | 0.062 (0.047) | 0.18                          | 1.00                         | 0.001 (0.040)                       | 0.98                         | 1.00                         | −0.010 (0.020)                                     | 0.61                         | 1.00                         |
| Cystatin C | −0.042 (0.014)               | <b>0.0023</b>                | 0.02                         | 0.042 (0.049) | 0.38                          | 1.00                         | 0.019 (0.040)                       | 0.63                         | 1.00                         | −0.016 (0.020)                                     | 0.40                         | 1.00                         |
| GDF15      | −0.046 (0.014)               | <b>0.0008</b>                | 0.008                        | 0.048 (0.046) | 0.31                          | 1.00                         | 0.035 (0.039)                       | 0.37                         | 1.00                         | −0.029 (0.019)                                     | 0.13                         | 1.00                         |
| Leptin     | −0.019 (0.021)               | 0.36                         | 1.00                         | 0.027 (0.073) | 0.71                          | 1.00                         | 0.053 (0.060)                       | 0.38                         | 1.00                         | −0.005 (0.030)                                     | 0.88                         | 1.00                         |
| logA1C     | −0.077 (0.014)               | <b>3.0 × 10<sup>−8</sup></b> | <b>3.0 × 10<sup>−7</sup></b> | 0.298 (0.047) | <b>3.1 × 10<sup>−10</sup></b> | <b>3.1 × 10<sup>−9</sup></b> | 0.187 (0.040)                       | <b>3.6 × 10<sup>−6</sup></b> | <b>3.6 × 10<sup>−5</sup></b> | −0.103 (0.020)                                     | <b>1.7 × 10<sup>−7</sup></b> | <b>1.7 × 10<sup>−6</sup></b> |
| logCRP     | −0.062 (0.015)               | <b>2.2 × 10<sup>−5</sup></b> | <b>2.2 × 10<sup>−4</sup></b> | 0.173 (0.052) | <b>0.0008</b>                 | <b>0.008</b>                 | 0.116 (0.042)                       | <b>0.0059</b>                | 0.06                         | −0.075 (0.021)                                     | <b>0.0003</b>                | <b>0.003</b>                 |
| Pack Yrs   | −0.054 (0.015)               | <b>0.0002</b>                | <b>0.002</b>                 | 0.128 (0.050) | <b>0.0106</b>                 | 0.11                         | 0.059 (0.042)                       | 0.1594                       | 1.00                         | −0.042 (0.021)                                     | <b>0.0447</b>                | 0.45                         |
| PAI1       | −0.038 (0.015)               | <b>0.0117</b>                | 0.12                         | 0.196 (0.052) | <b>0.0002</b>                 | <b>0.002</b>                 | 0.126 (0.043)                       | <b>0.0032</b>                | <b>0.032</b>                 | −0.075 (0.021)                                     | <b>0.0004</b>                | <b>0.004</b>                 |
| TIMP1      | −0.031 (0.014)               | <b>0.0265</b>                | 0.26                         | 0.033 (0.049) | 0.50                          | 1.00                         | 0.016 (0.040)                       | 0.69                         | 1.00                         | −0.027 (0.020)                                     | 0.17                         | 1.00                         |

Models are adjusted for age, gender, center, and Hispanic background. Adj\_P: P-value adjusted for the number of surrogate biomarkers. ADM: Adrenomedullin; B2M: β2-microglobulin; GDF15: Growth differentiation factor 15; logA1c: hemoglobin A1C (log transformed); logCRP: C-reactive protein (log transformed); Pack Yrs: Smoking in pack/year; PAI-1: Plasminogen activator inhibitor 1; TIMP1: tissue inhibitor metalloproteinase 1
